# Supplementary material for: Evolutionary Dynamics of Cryptophyte Plastid Genomes
Source: PubMed Central journal article supplement — Genome Biol Evol. 2017 Jul 4;9(7):1859–72. doi: 10.1093/gbe/evx123 (PMC5534331; doi:10.1093/gbe/evx123), 2017-07-04
Supplement: evx123_SuppFig_S1.pdf [file evx123_SuppFig_S1.pdf]

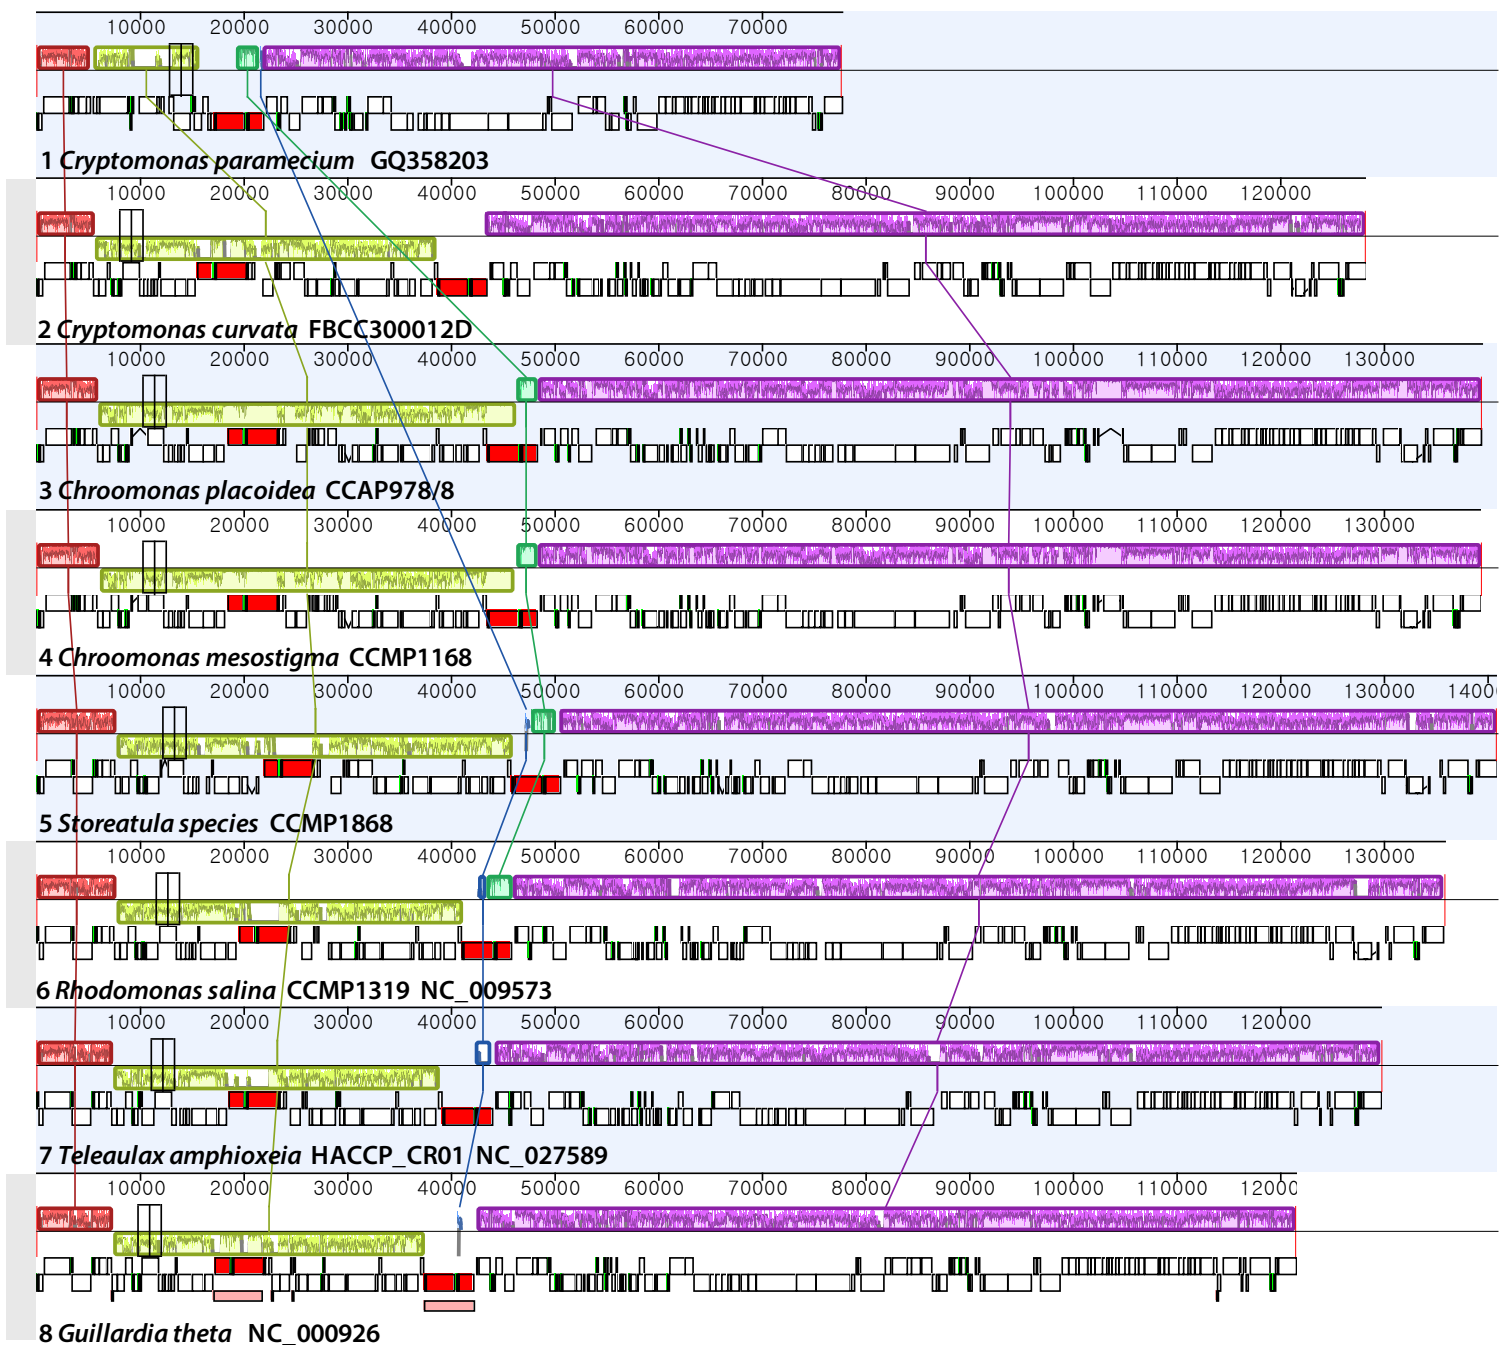

**Fig. S1. Overview of cryptophyte plastid genomes.** Linearized maps of the four novel complete plastid genomes are compared with the other cryptophytes. The color coded syntenic blocks are shown above each genome, and the gene maps are shown below each genome. The syntenic blocks above the horizontal line are on the same strand, and those below the line are on the opposite strand. The horizontal bars inside the syntenic blocks show sequence conservation. The block boundaries correspond to the sites where inversion events occurred. In the gene maps, the genes above the horizontal line are transcribed from left to right, and those below the horizontal line are transcribed from right to left. The rRNA operons are shown in red.
