# Supplementary material for: Evolutionary Dynamics of Cryptophyte Plastid Genomes
Source: PubMed Central journal article supplement — Genome Biol Evol. 2017 Jul 4;9(7):1859–72. doi: 10.1093/gbe/evx123 (PMC5534331; doi:10.1093/gbe/evx123), 2017-07-04
Supplement: evx123_SuppFig_S5.pdf [file evx123_SuppFig_S5.pdf]

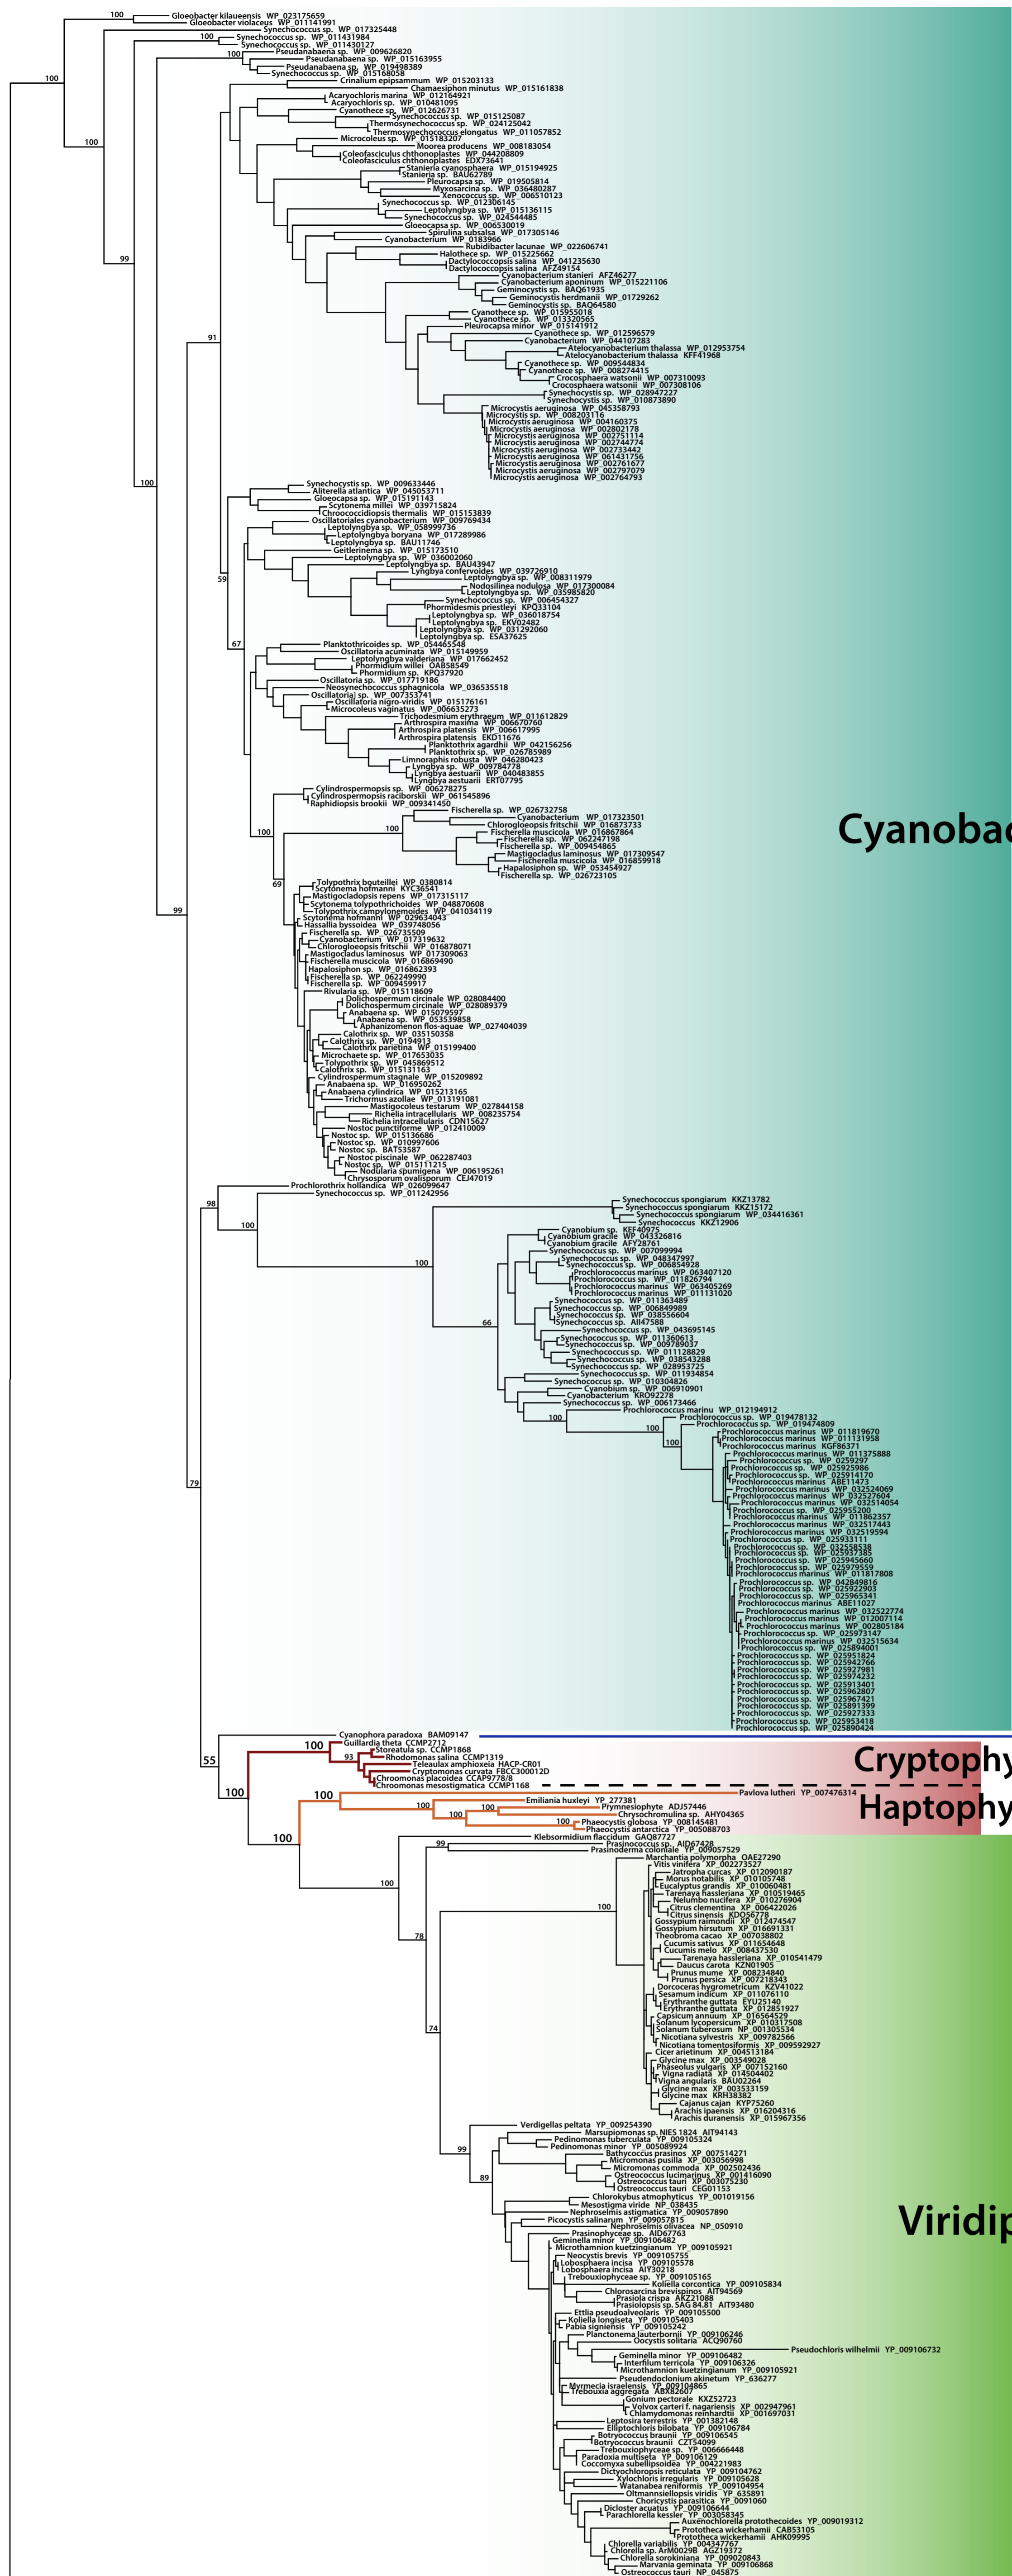

Cyanobacteria

Glaucophyta

Cryptophyta  
Haptophyta

Viridiplantae

Bacteria

Figure S5. Phylogenetic tree base on *minD*.
