# Supplementary figures and images for: Evolutionary Dynamics of Cryptophyte Plastid Genomes
Source: PubMed Central journal article supplement — Genome Biol Evol. 2017 Jul 4;9(7):1859–72. doi: 10.1093/gbe/evx123 (PMC5534331; doi:10.1093/gbe/evx123), 2017-07-04

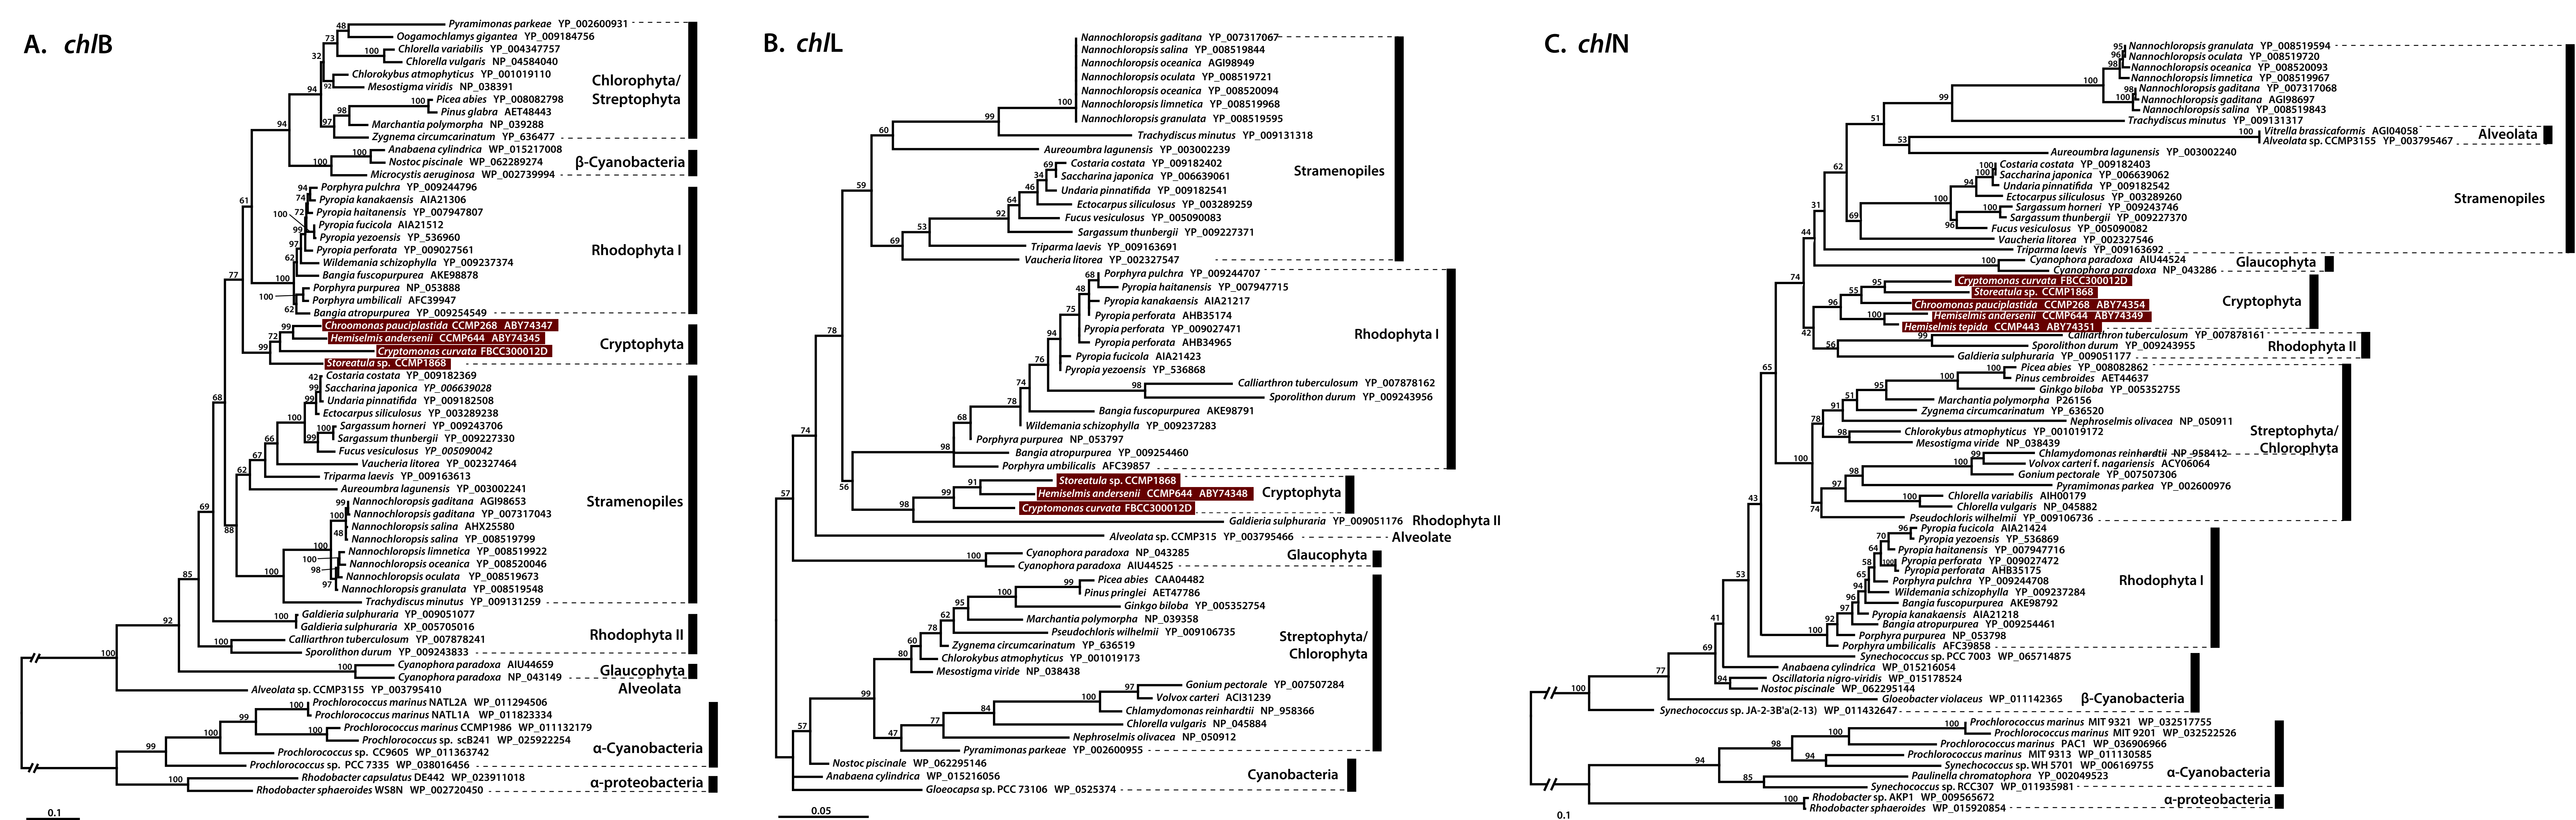

Figure S10. Phylogenetic tree based on LIPOR (*chIB/chIL/chIN*).

Supplement: evx123_SuppFig_S10.pdf [file evx123_SuppFig_S10.pdf]

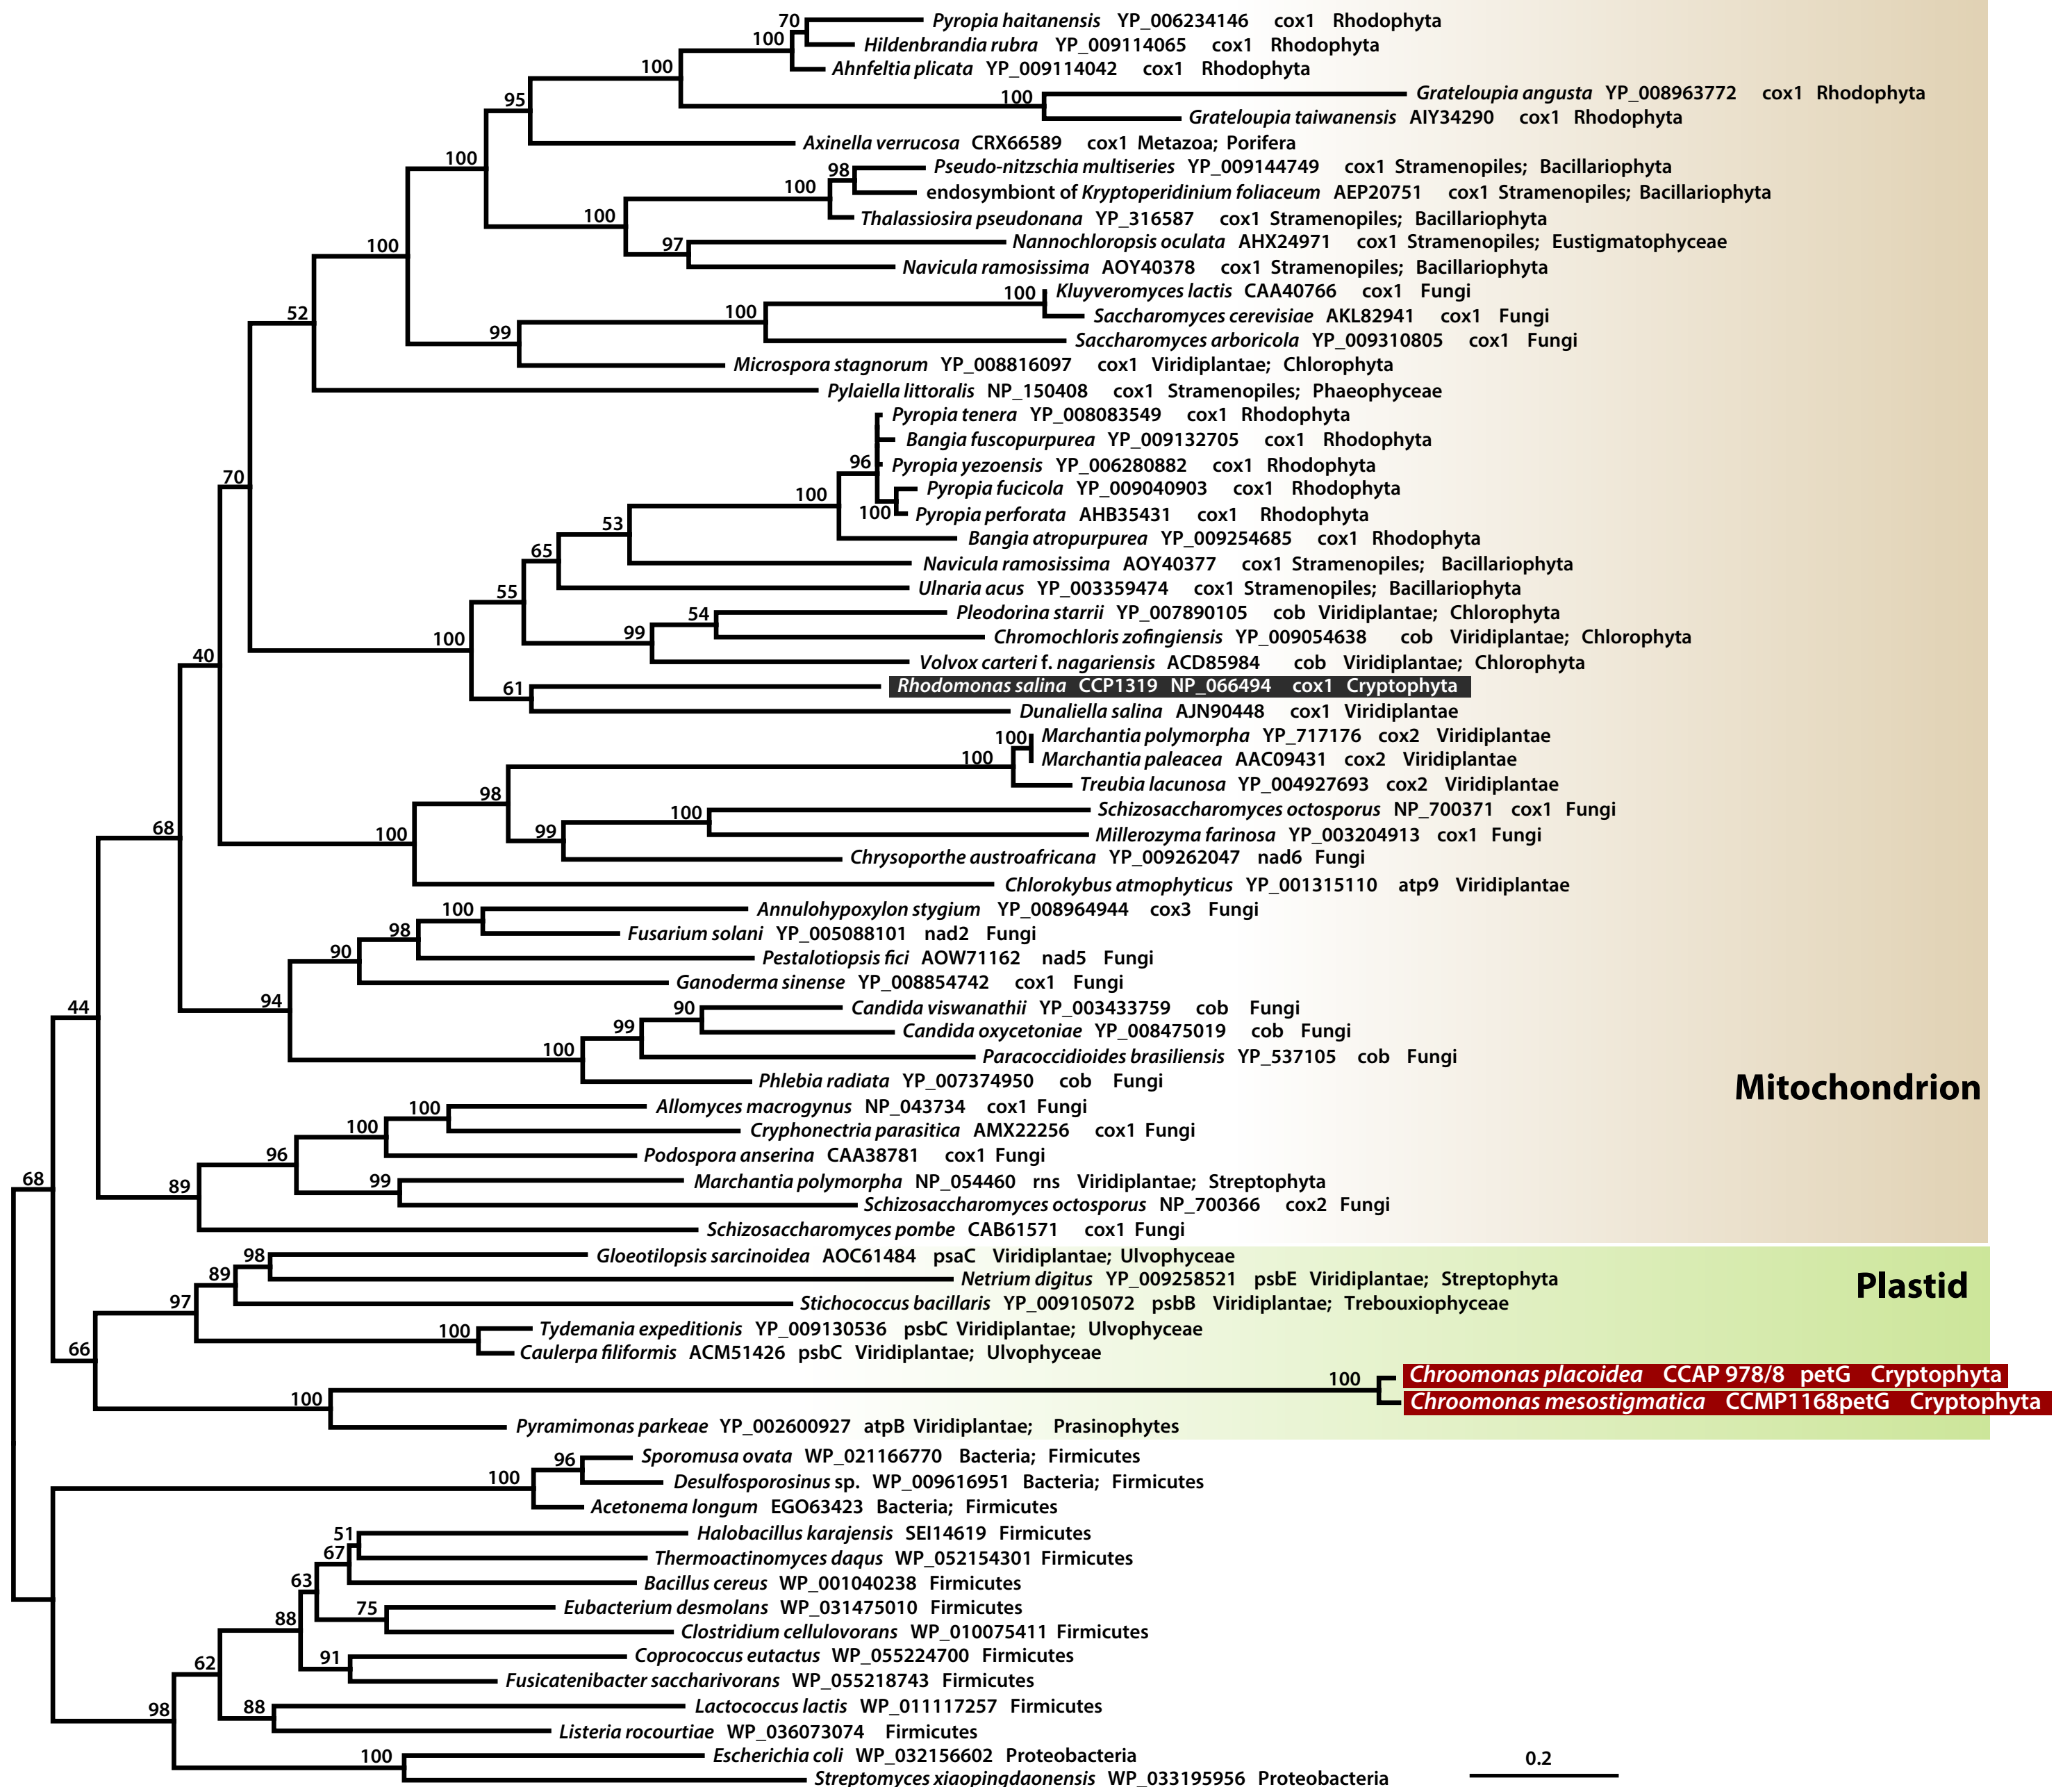

Figure S11. Phylogenetic tree based on intron ORFs (maturase K) within *petG*.

Supplement: evx123_SuppFig_S11.pdf [file evx123_SuppFig_S11.pdf]

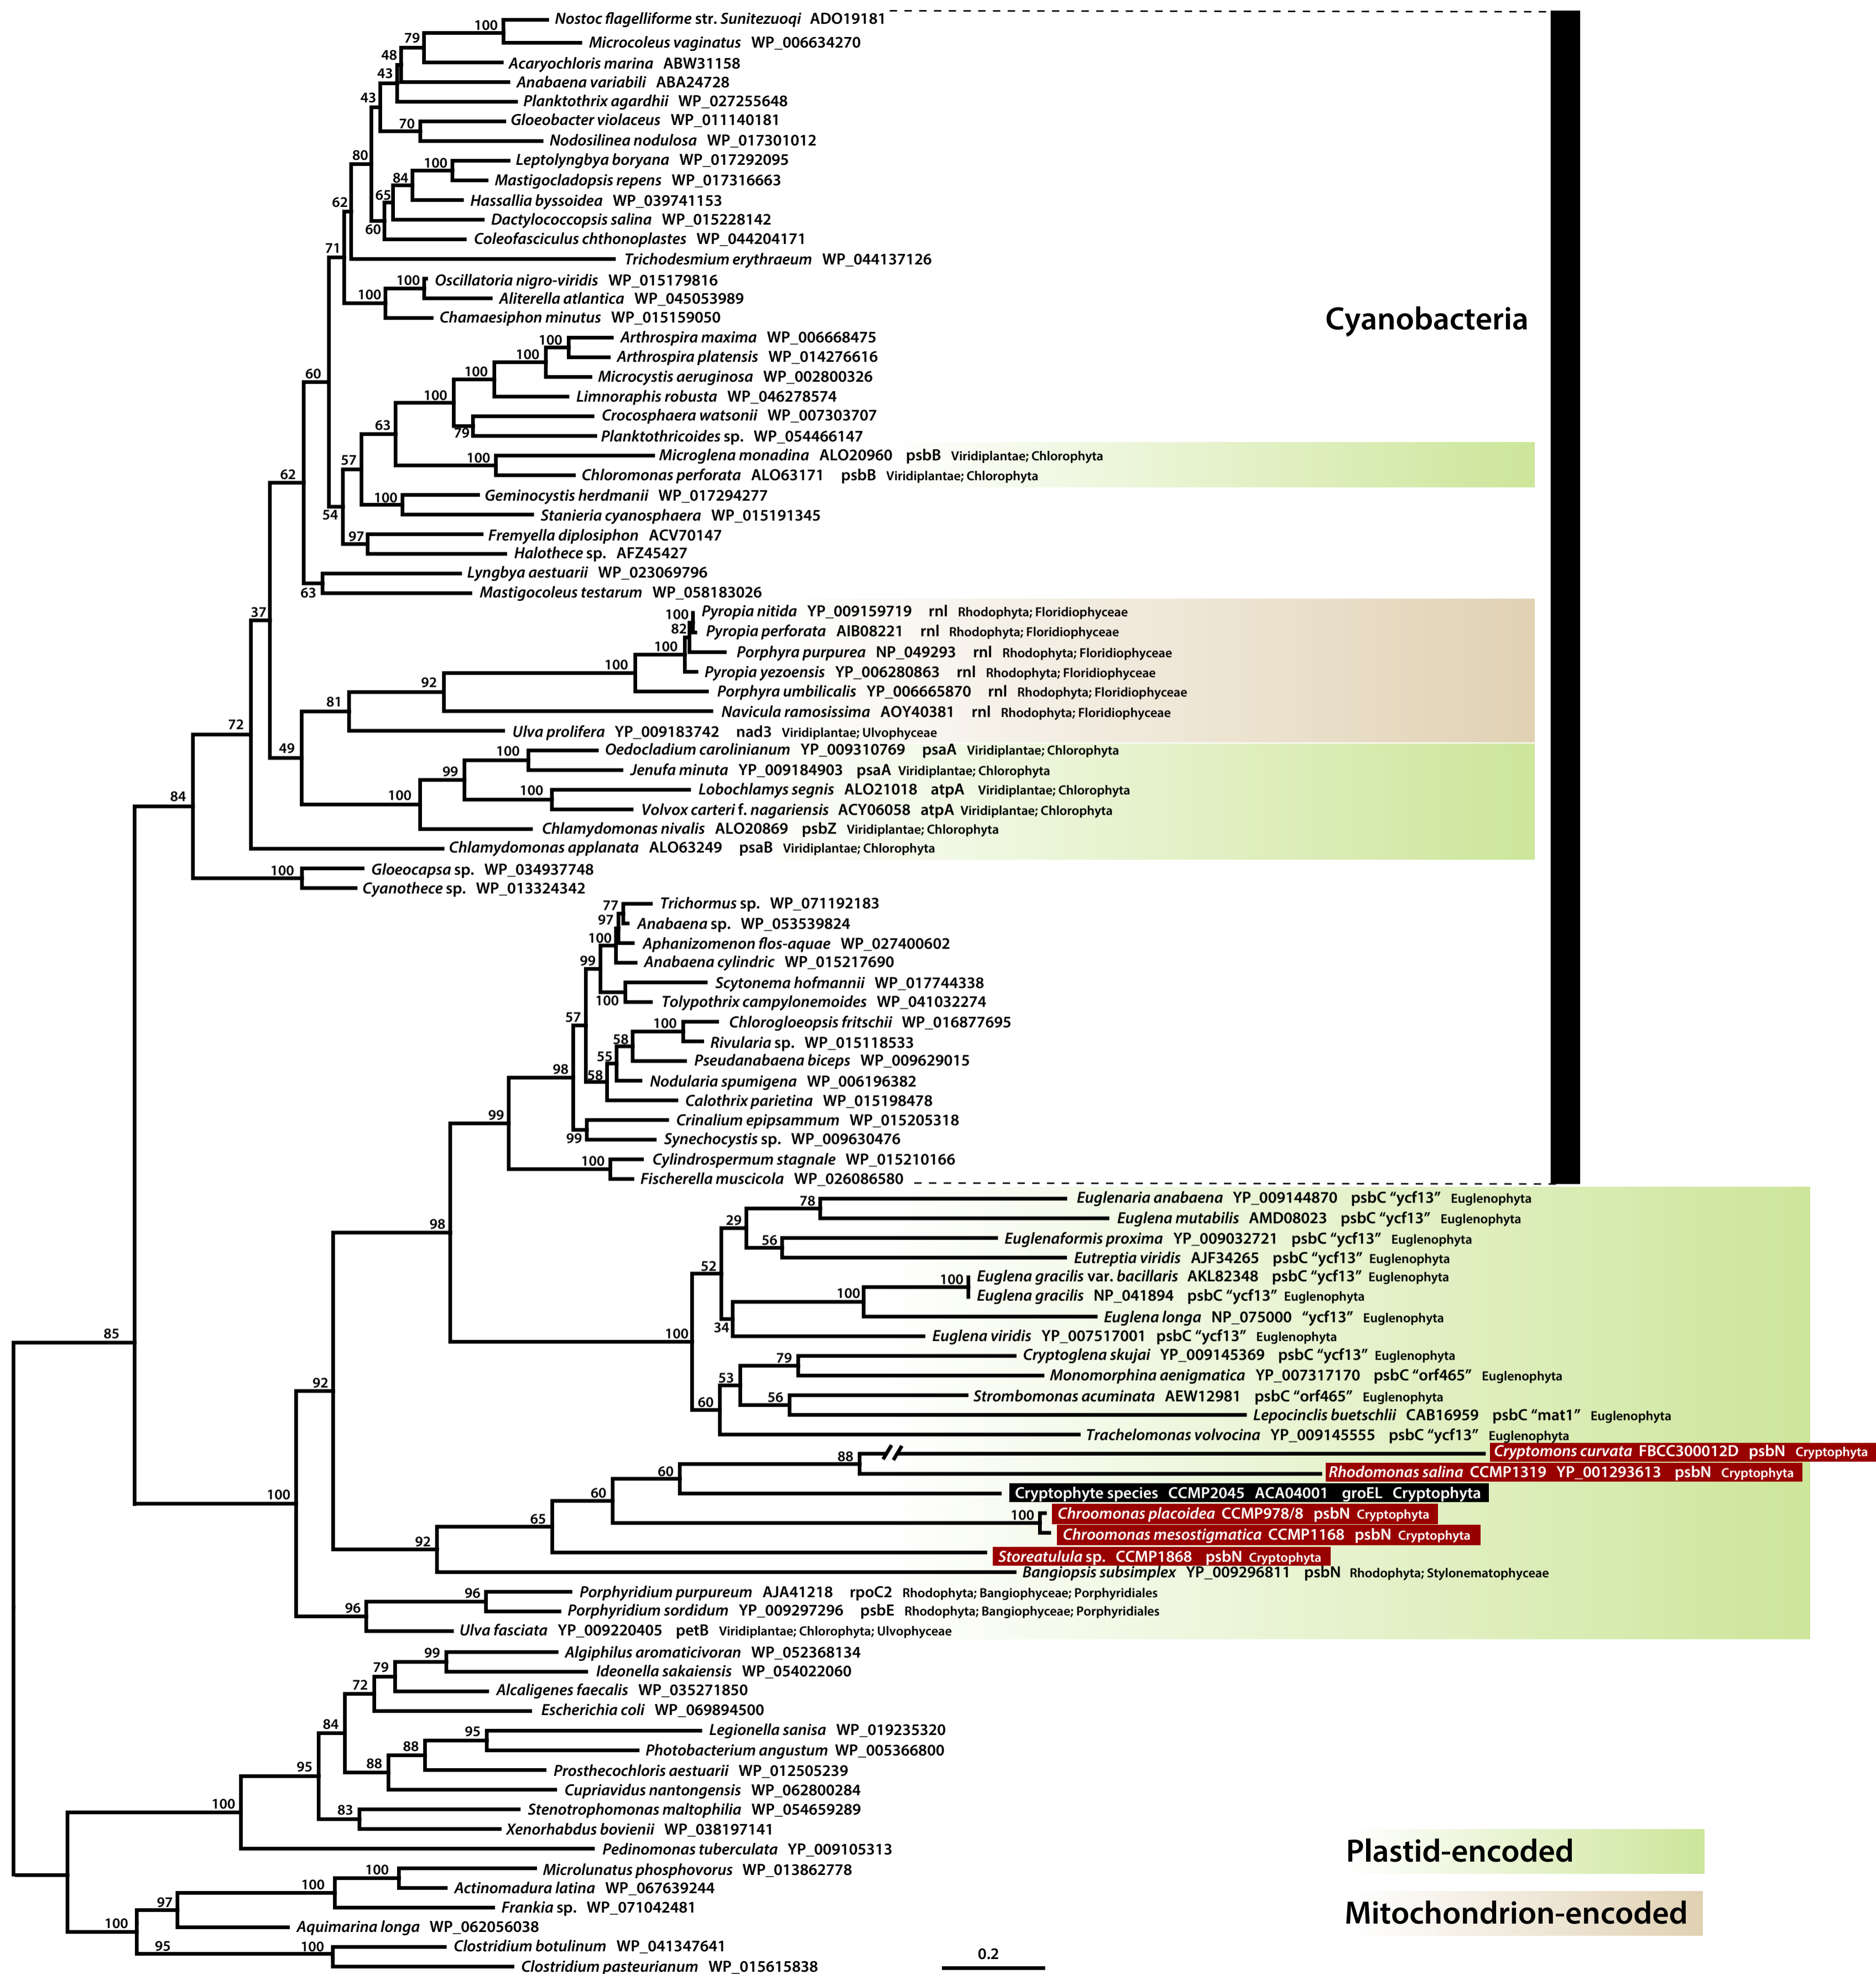

Figure S12. Phylogenetic tree based on intron ORFs (reverse transcriptase) within *psbN*.

Supplement: evx123_SuppFig_S12.pdf [file evx123_SuppFig_S12.pdf]

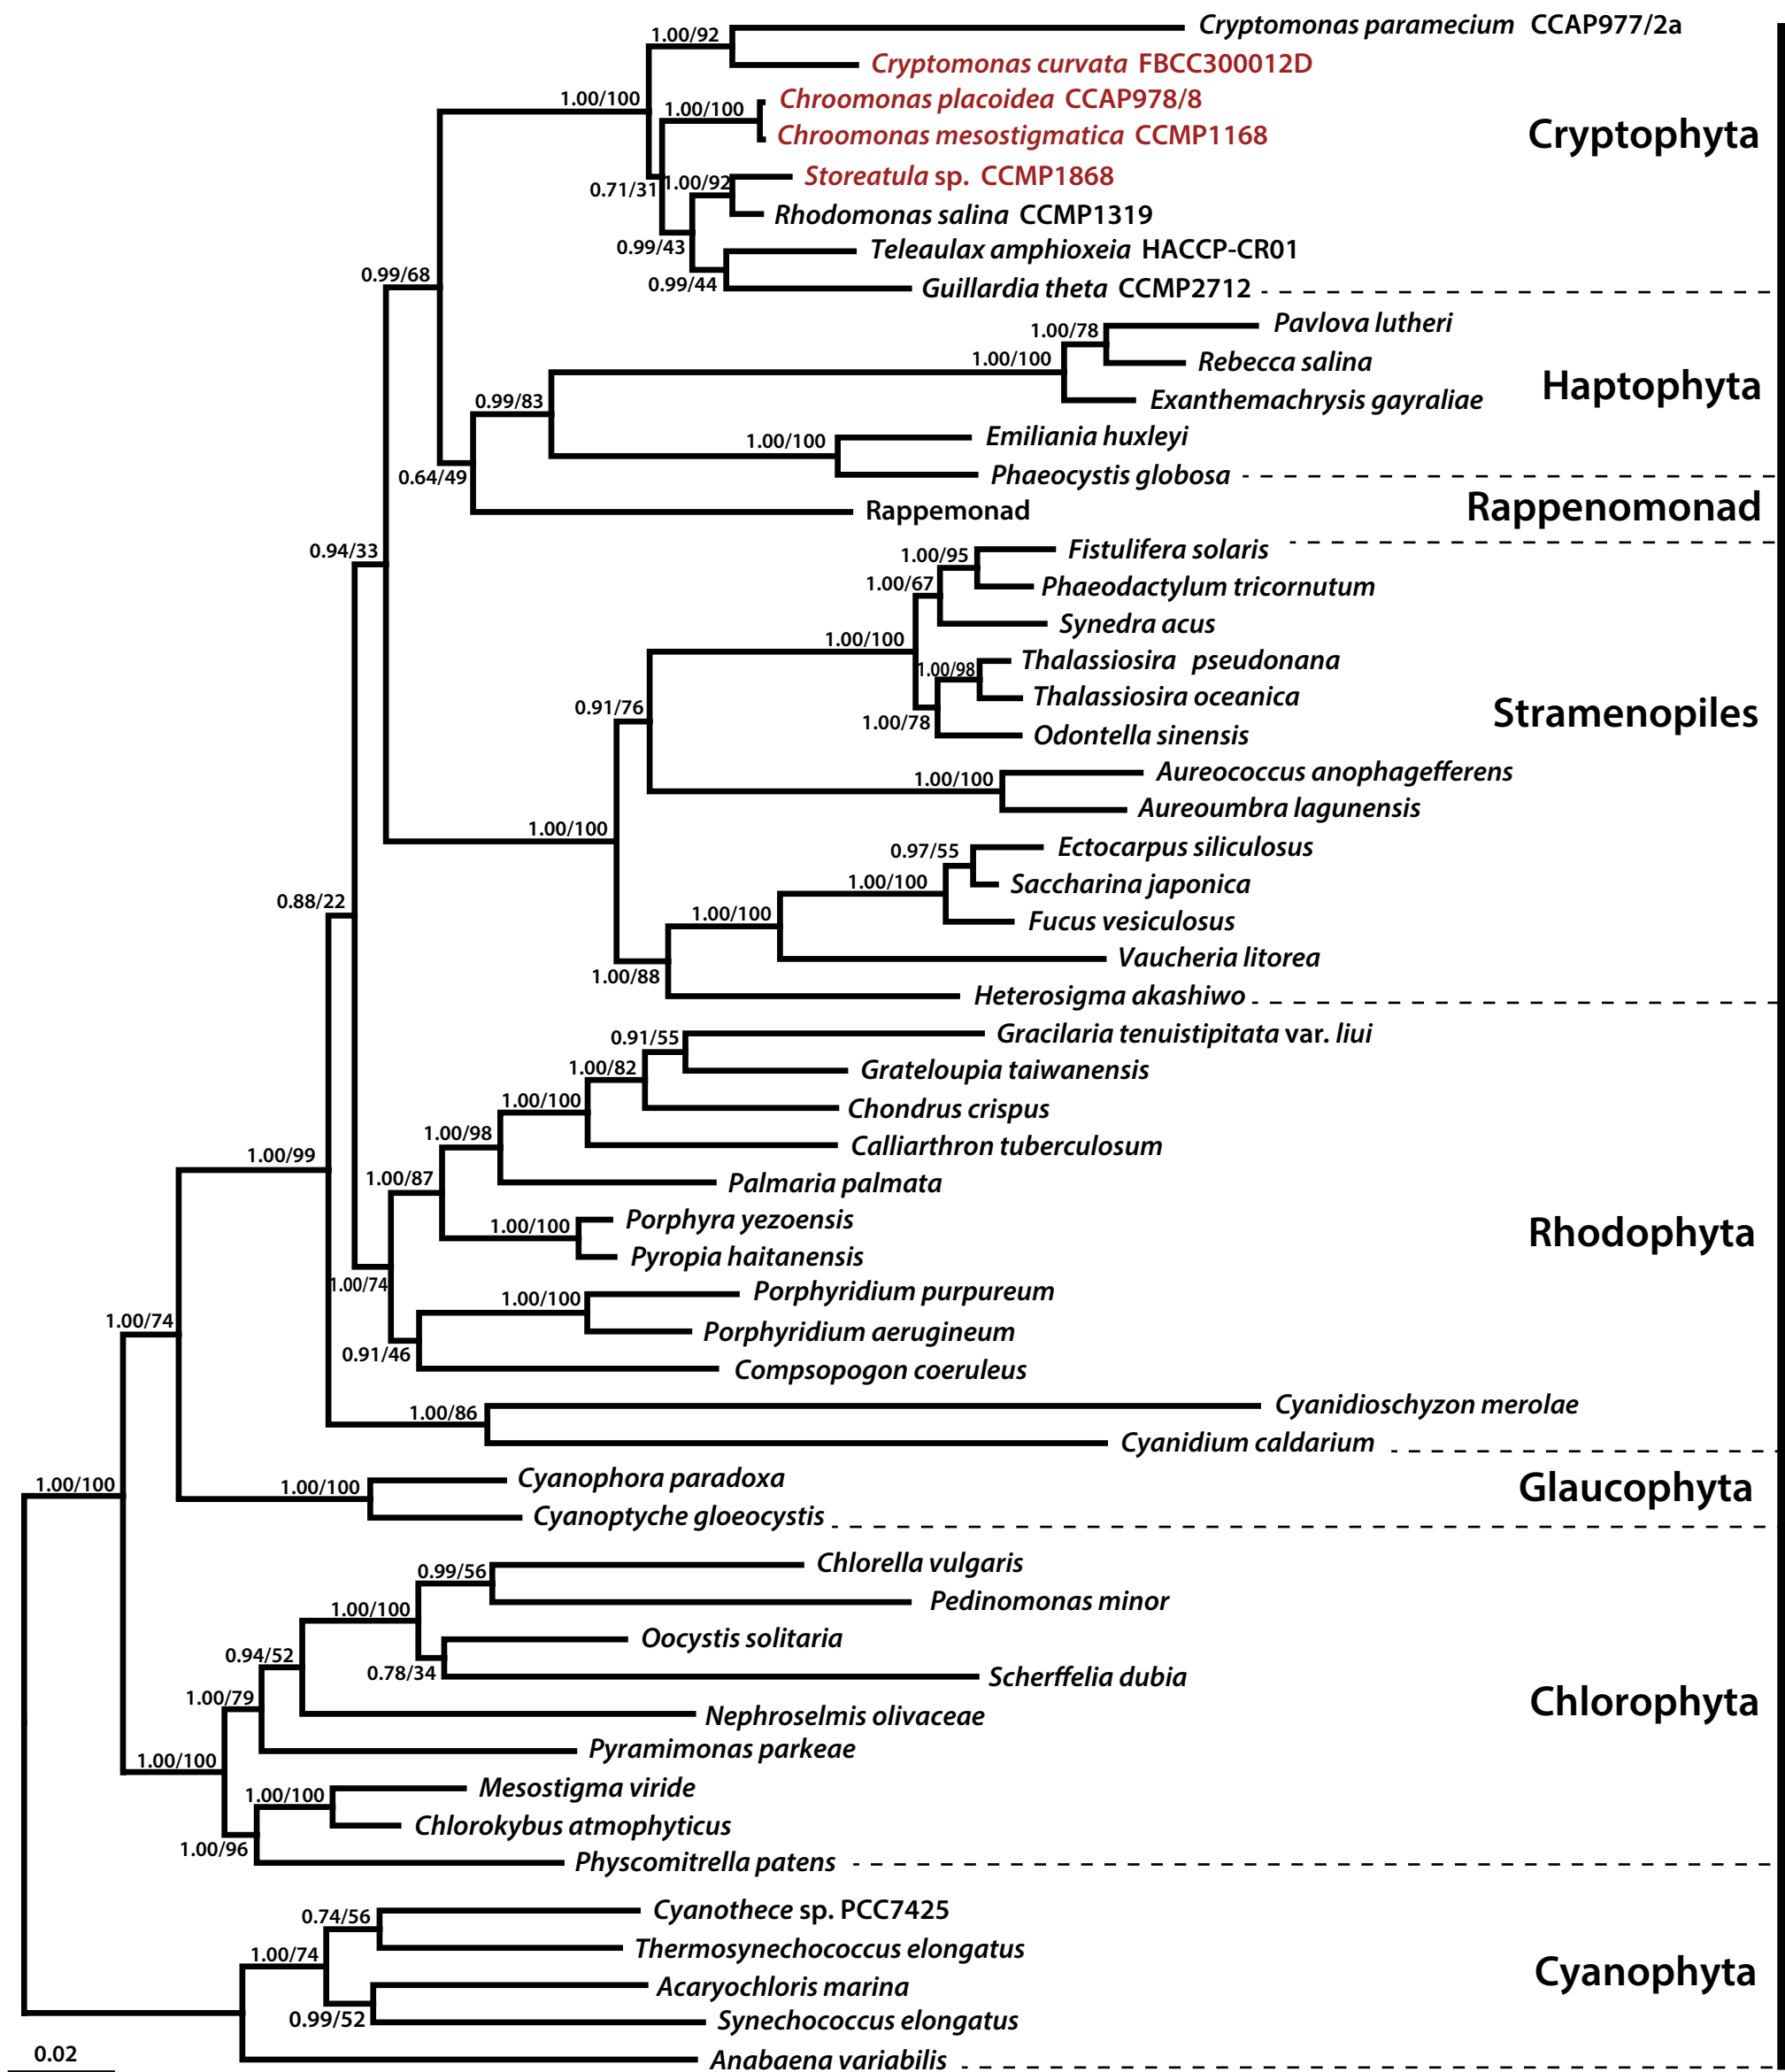

Figure S13. Bayesian tree based on RNA operon (16S-trnI-trnA-23S) sequences.

Supplement: evx123_SuppFig_S13.pdf [file evx123_SuppFig_S13.pdf]

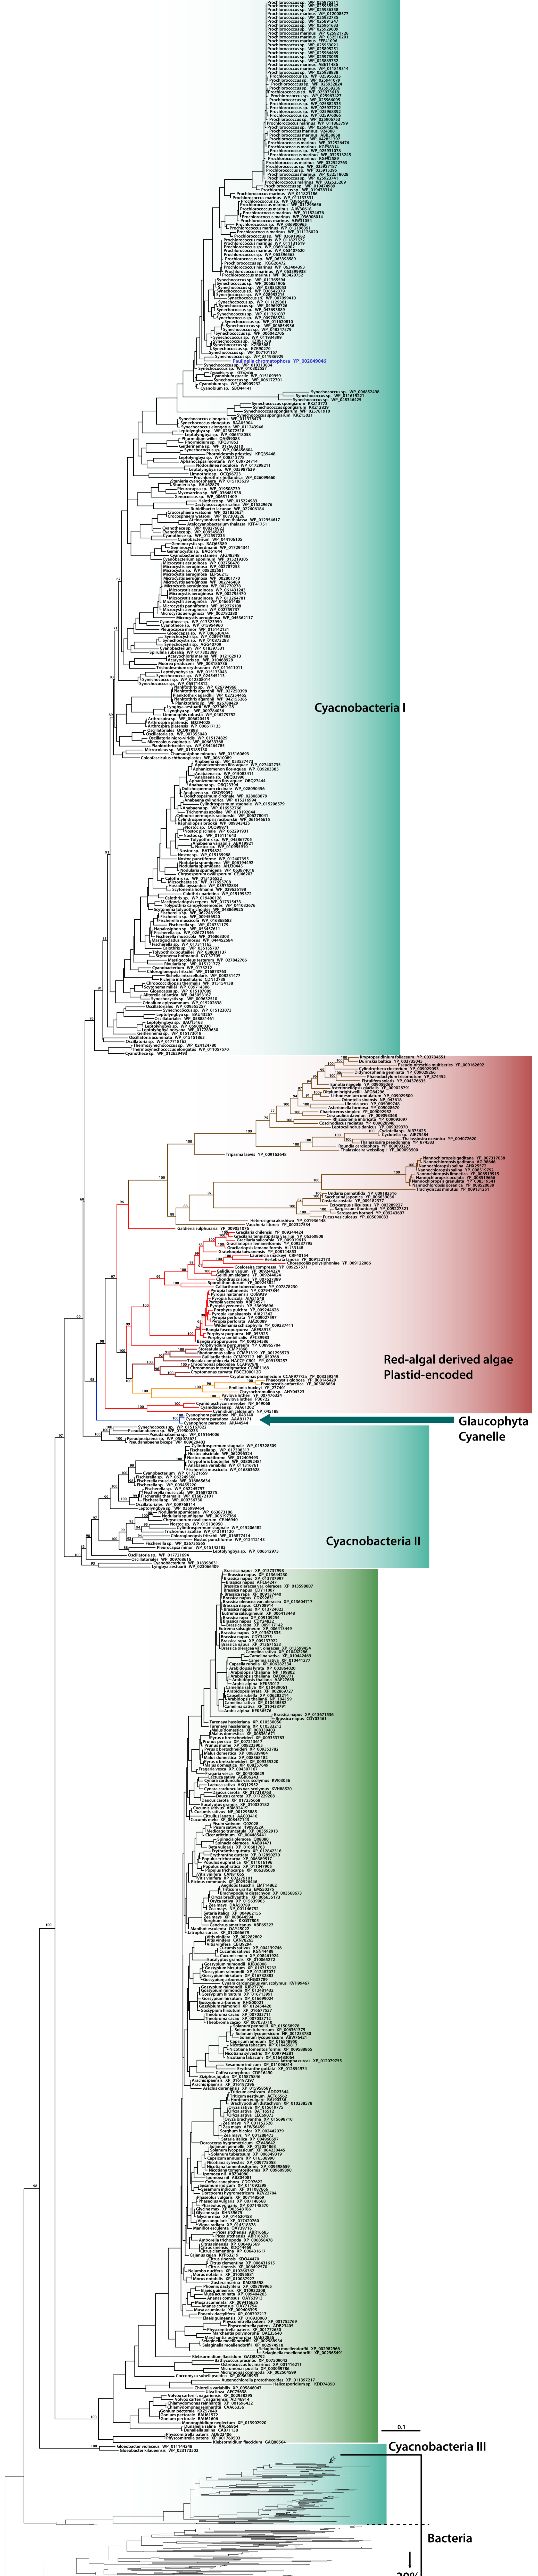

Figure S2. Phylogenetic tree based on *dnaK*.

Supplement: evx123_SuppFig_S2.pdf [file evx123_SuppFig_S2.pdf]

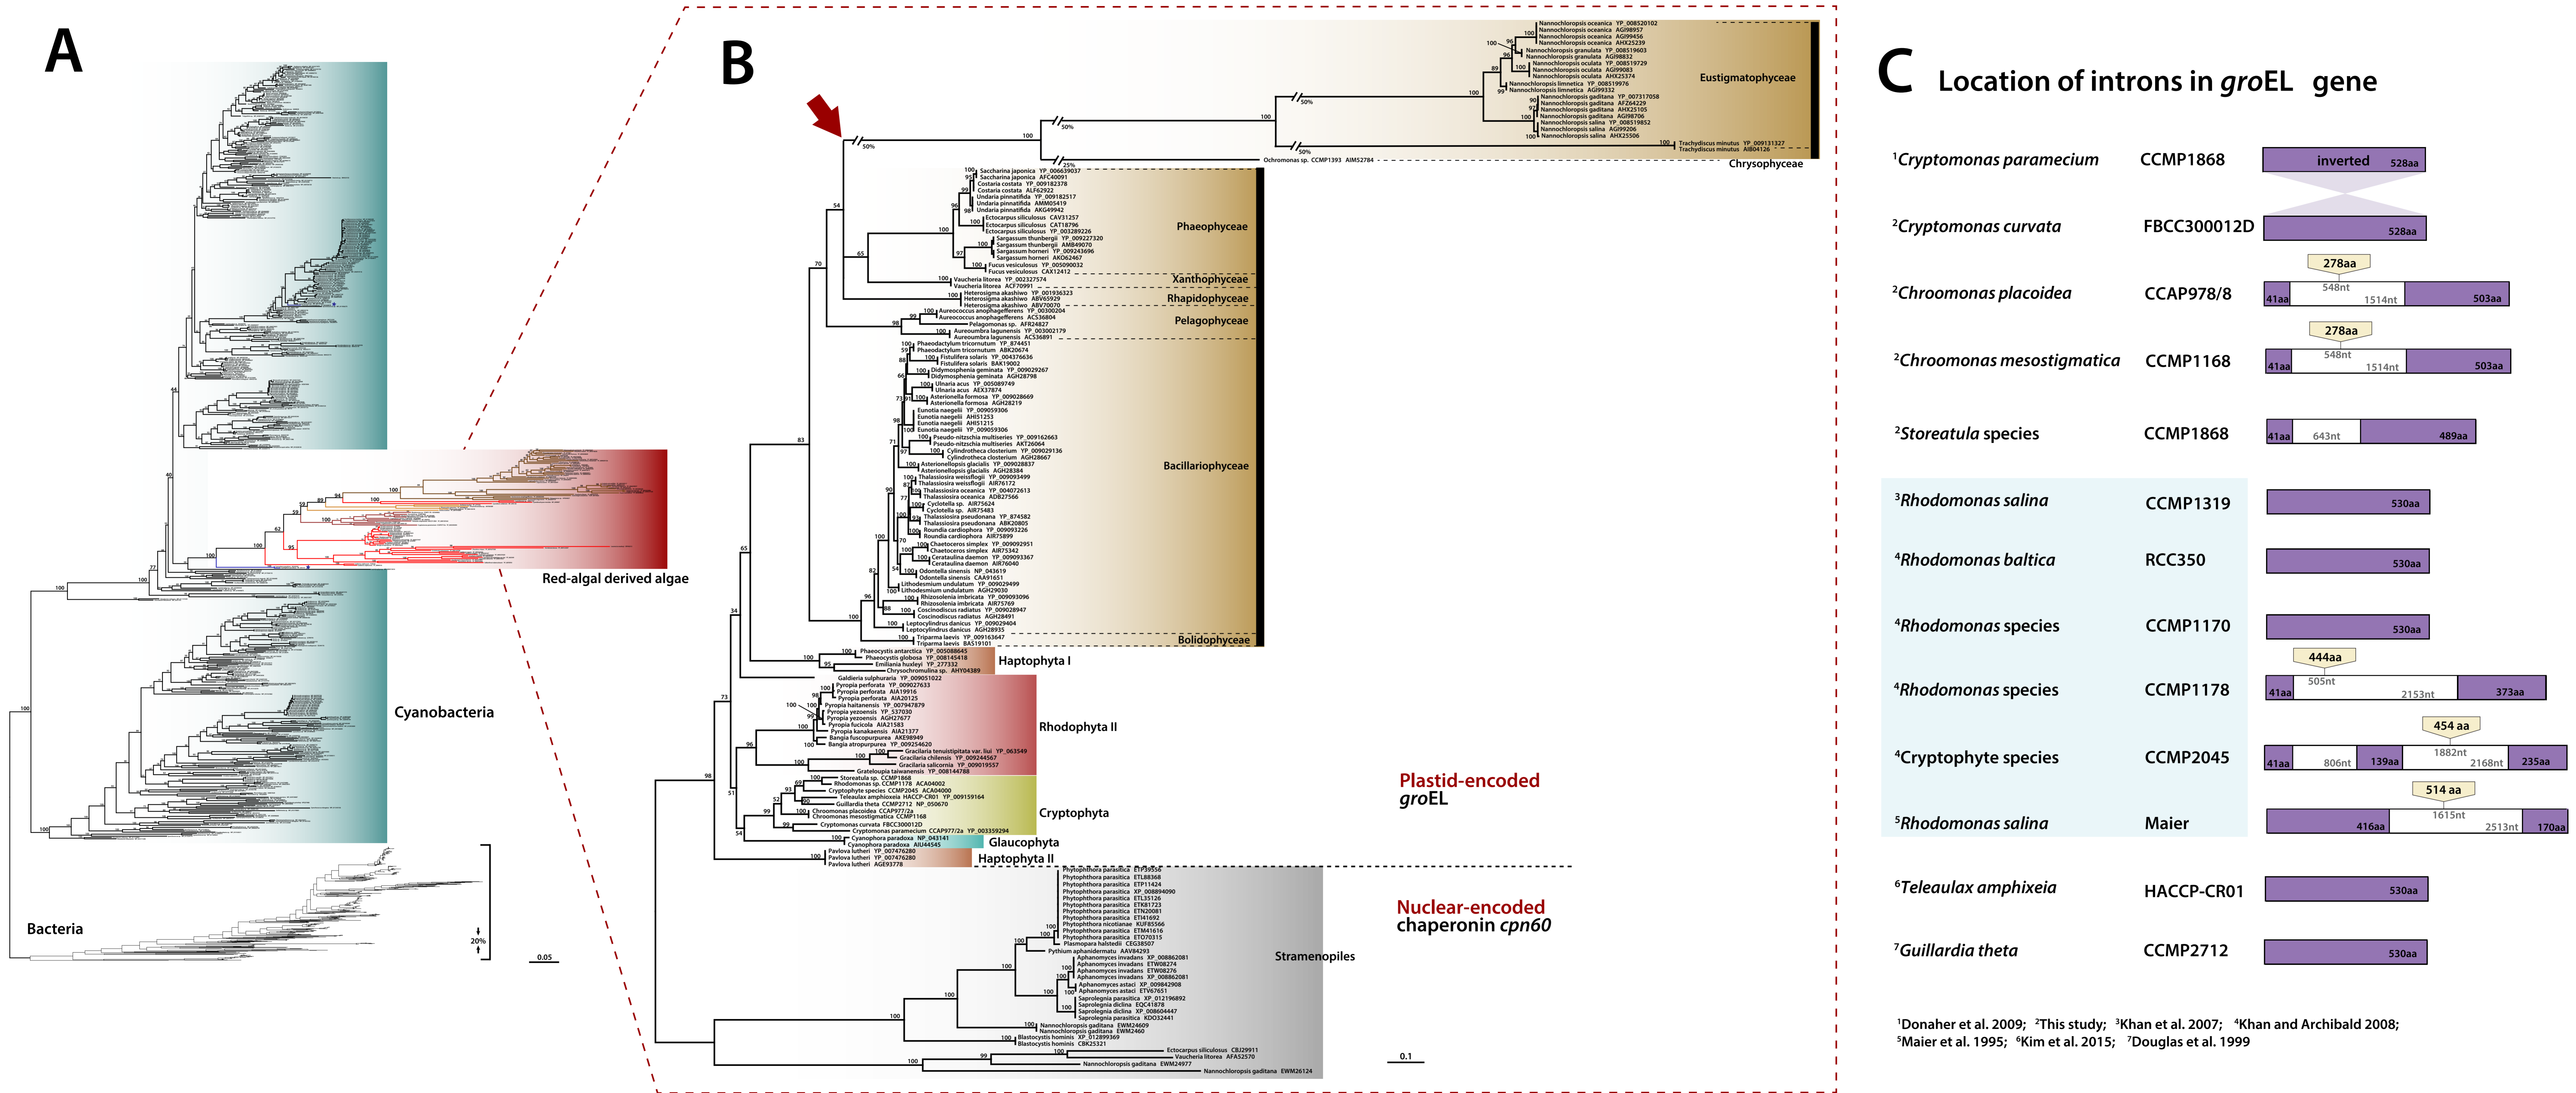

Figure S3. Phylogenetic tree based on *groEL*.

Supplement: evx123_SuppFig_S3.pdf [file evx123_SuppFig_S3.pdf]

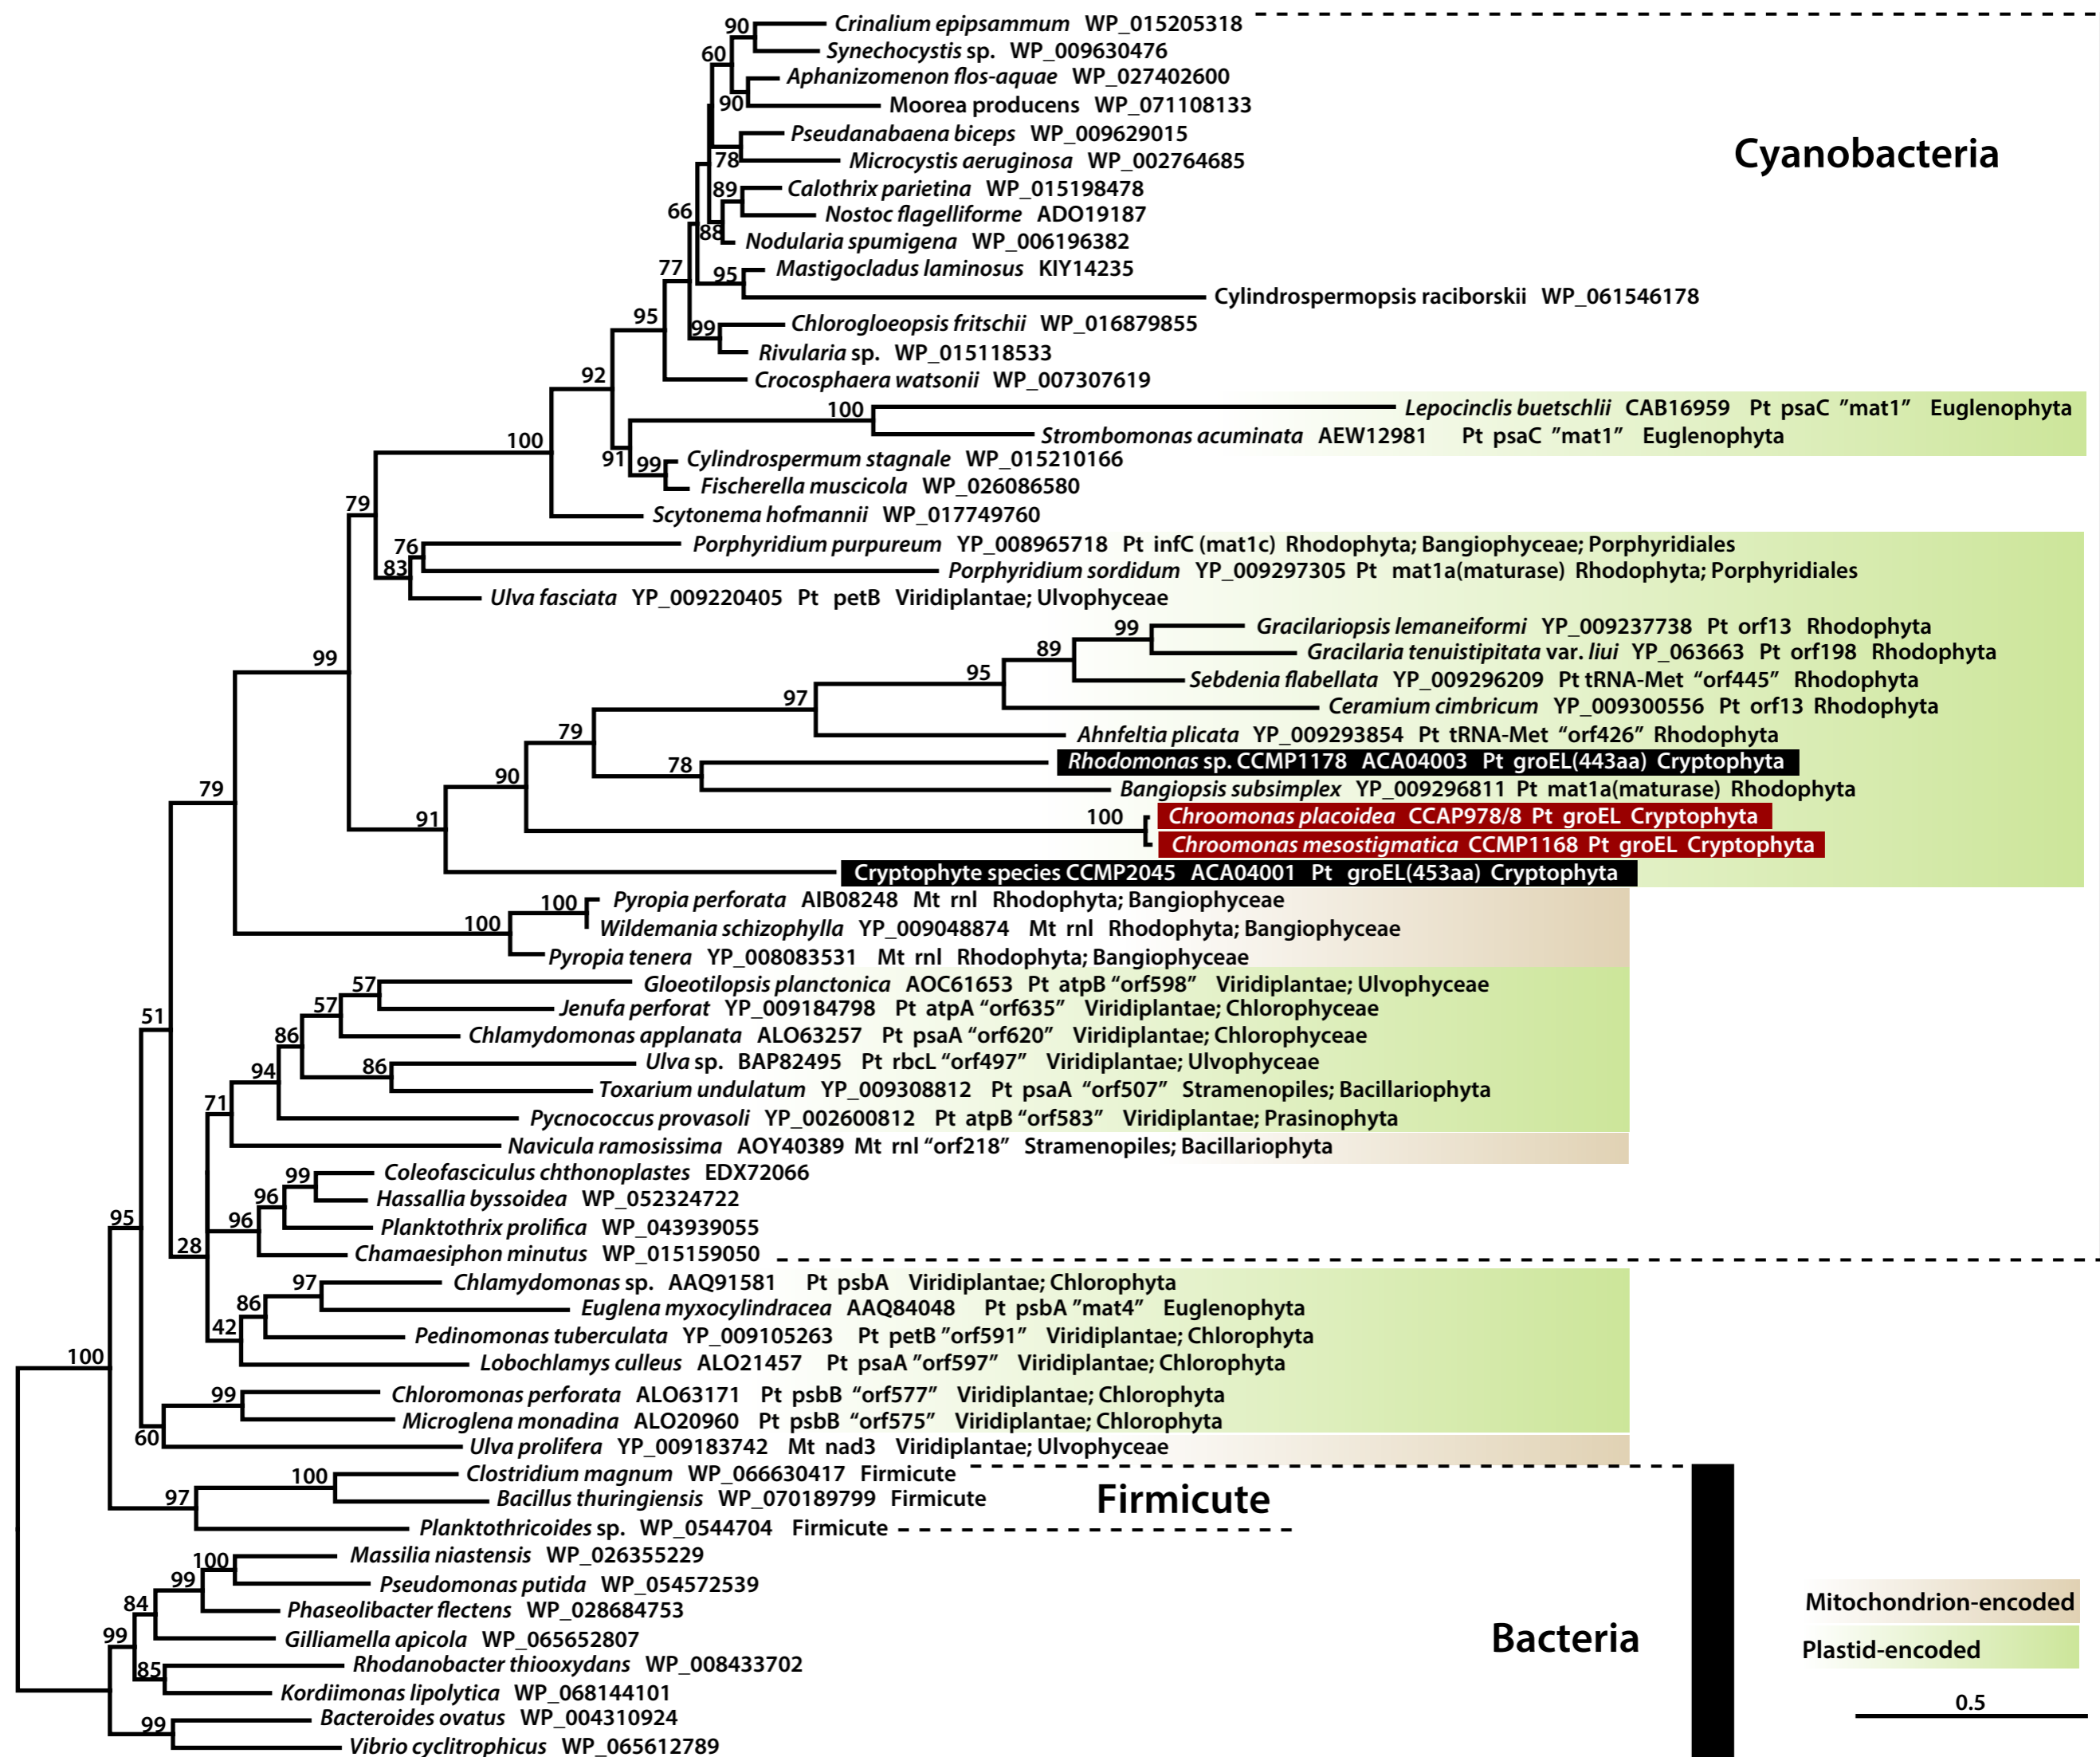

Figure S4. Phylogenetic tree based on intron ORFs within *groEL*.

Supplement: evx123_SuppFig_S4.pdf [file evx123_SuppFig_S4.pdf]

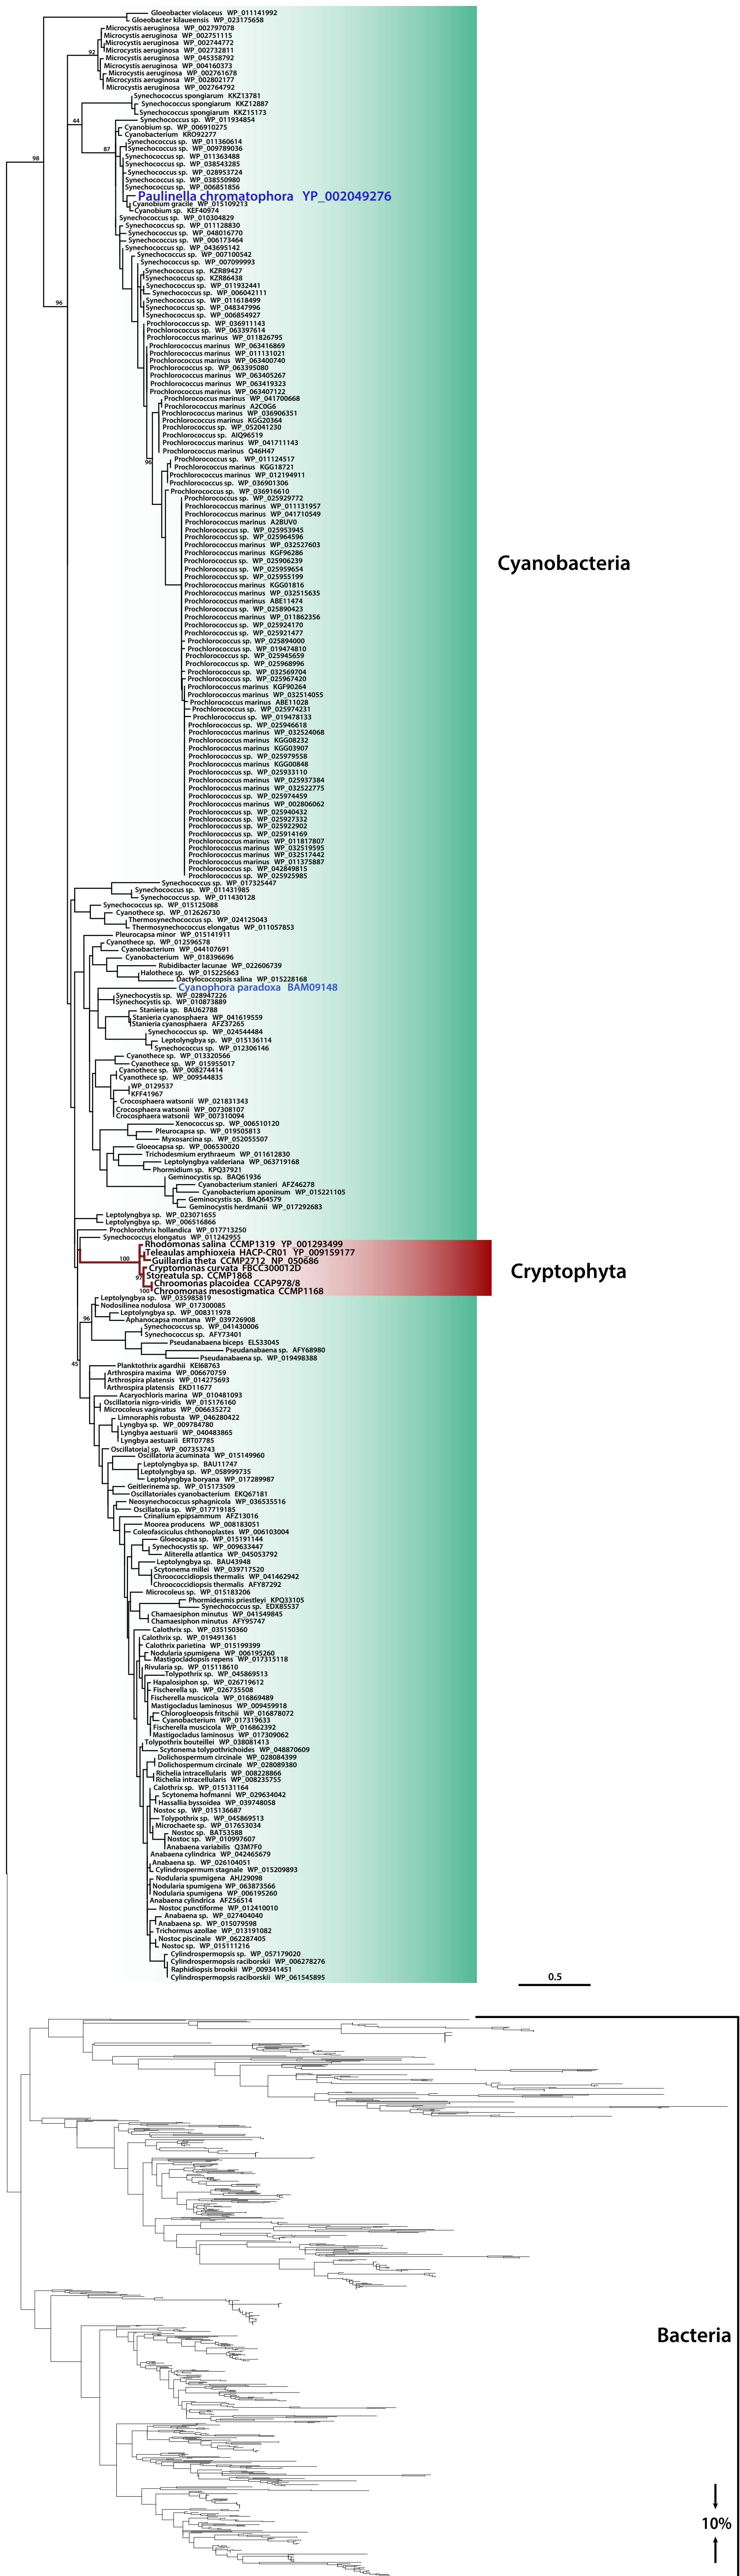

Figure S6. Phylogenetic tree based on *minE*.

Supplement: evx123_SuppFig_S6.pdf [file evx123_SuppFig_S6.pdf]

# Cyanobacteria

# Cryptophyta

# Bacteria

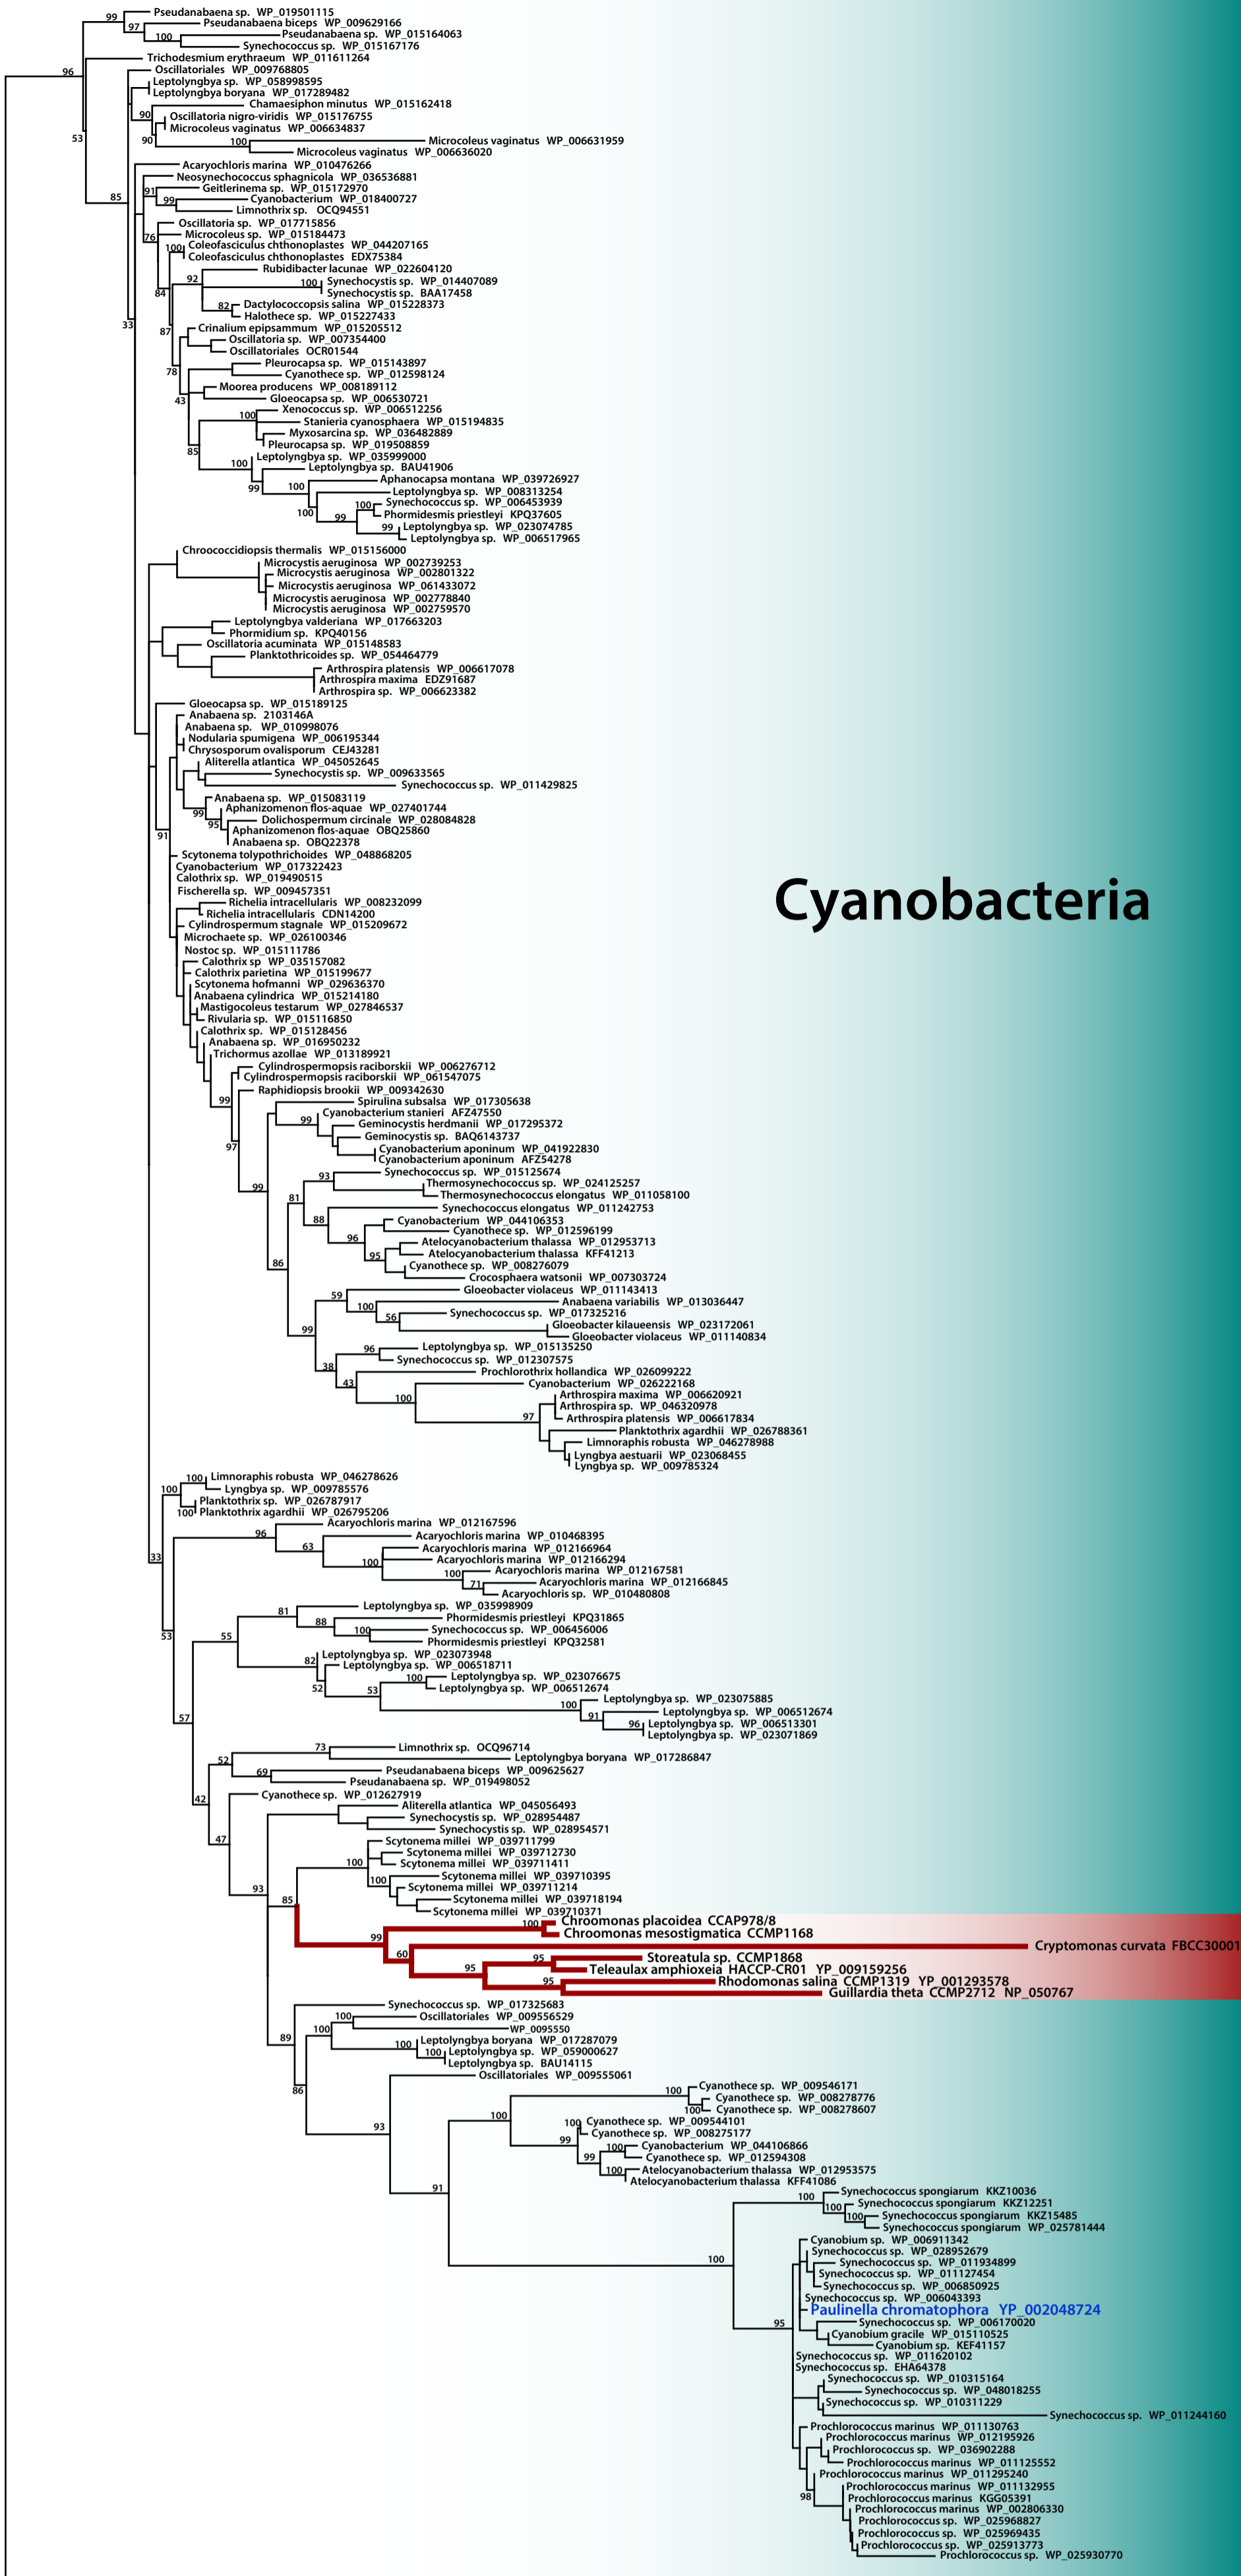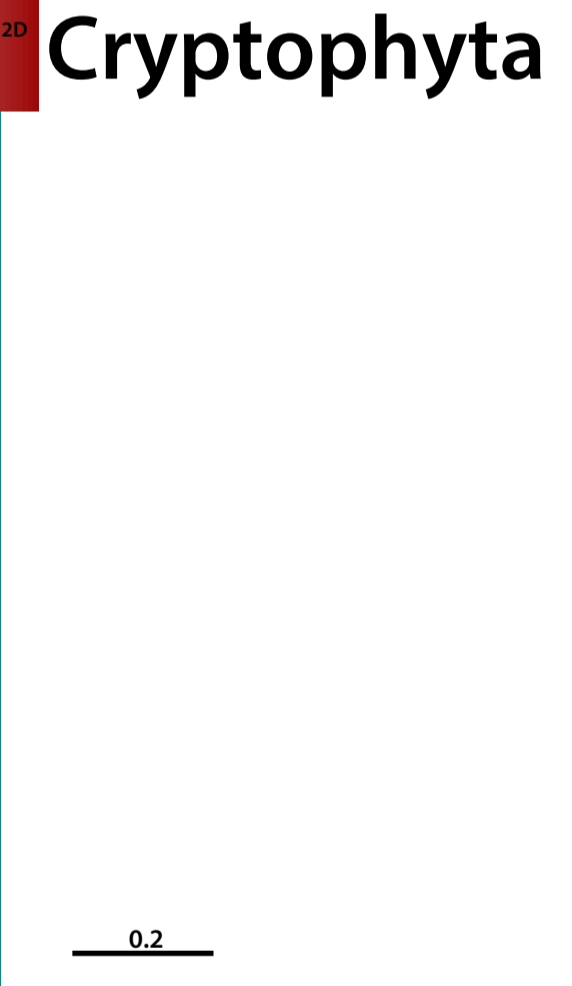

Figure S7. Phylogenetic tree based on *hlpA*.

Supplement: evx123_SuppFig_S7.pdf [file evx123_SuppFig_S7.pdf]

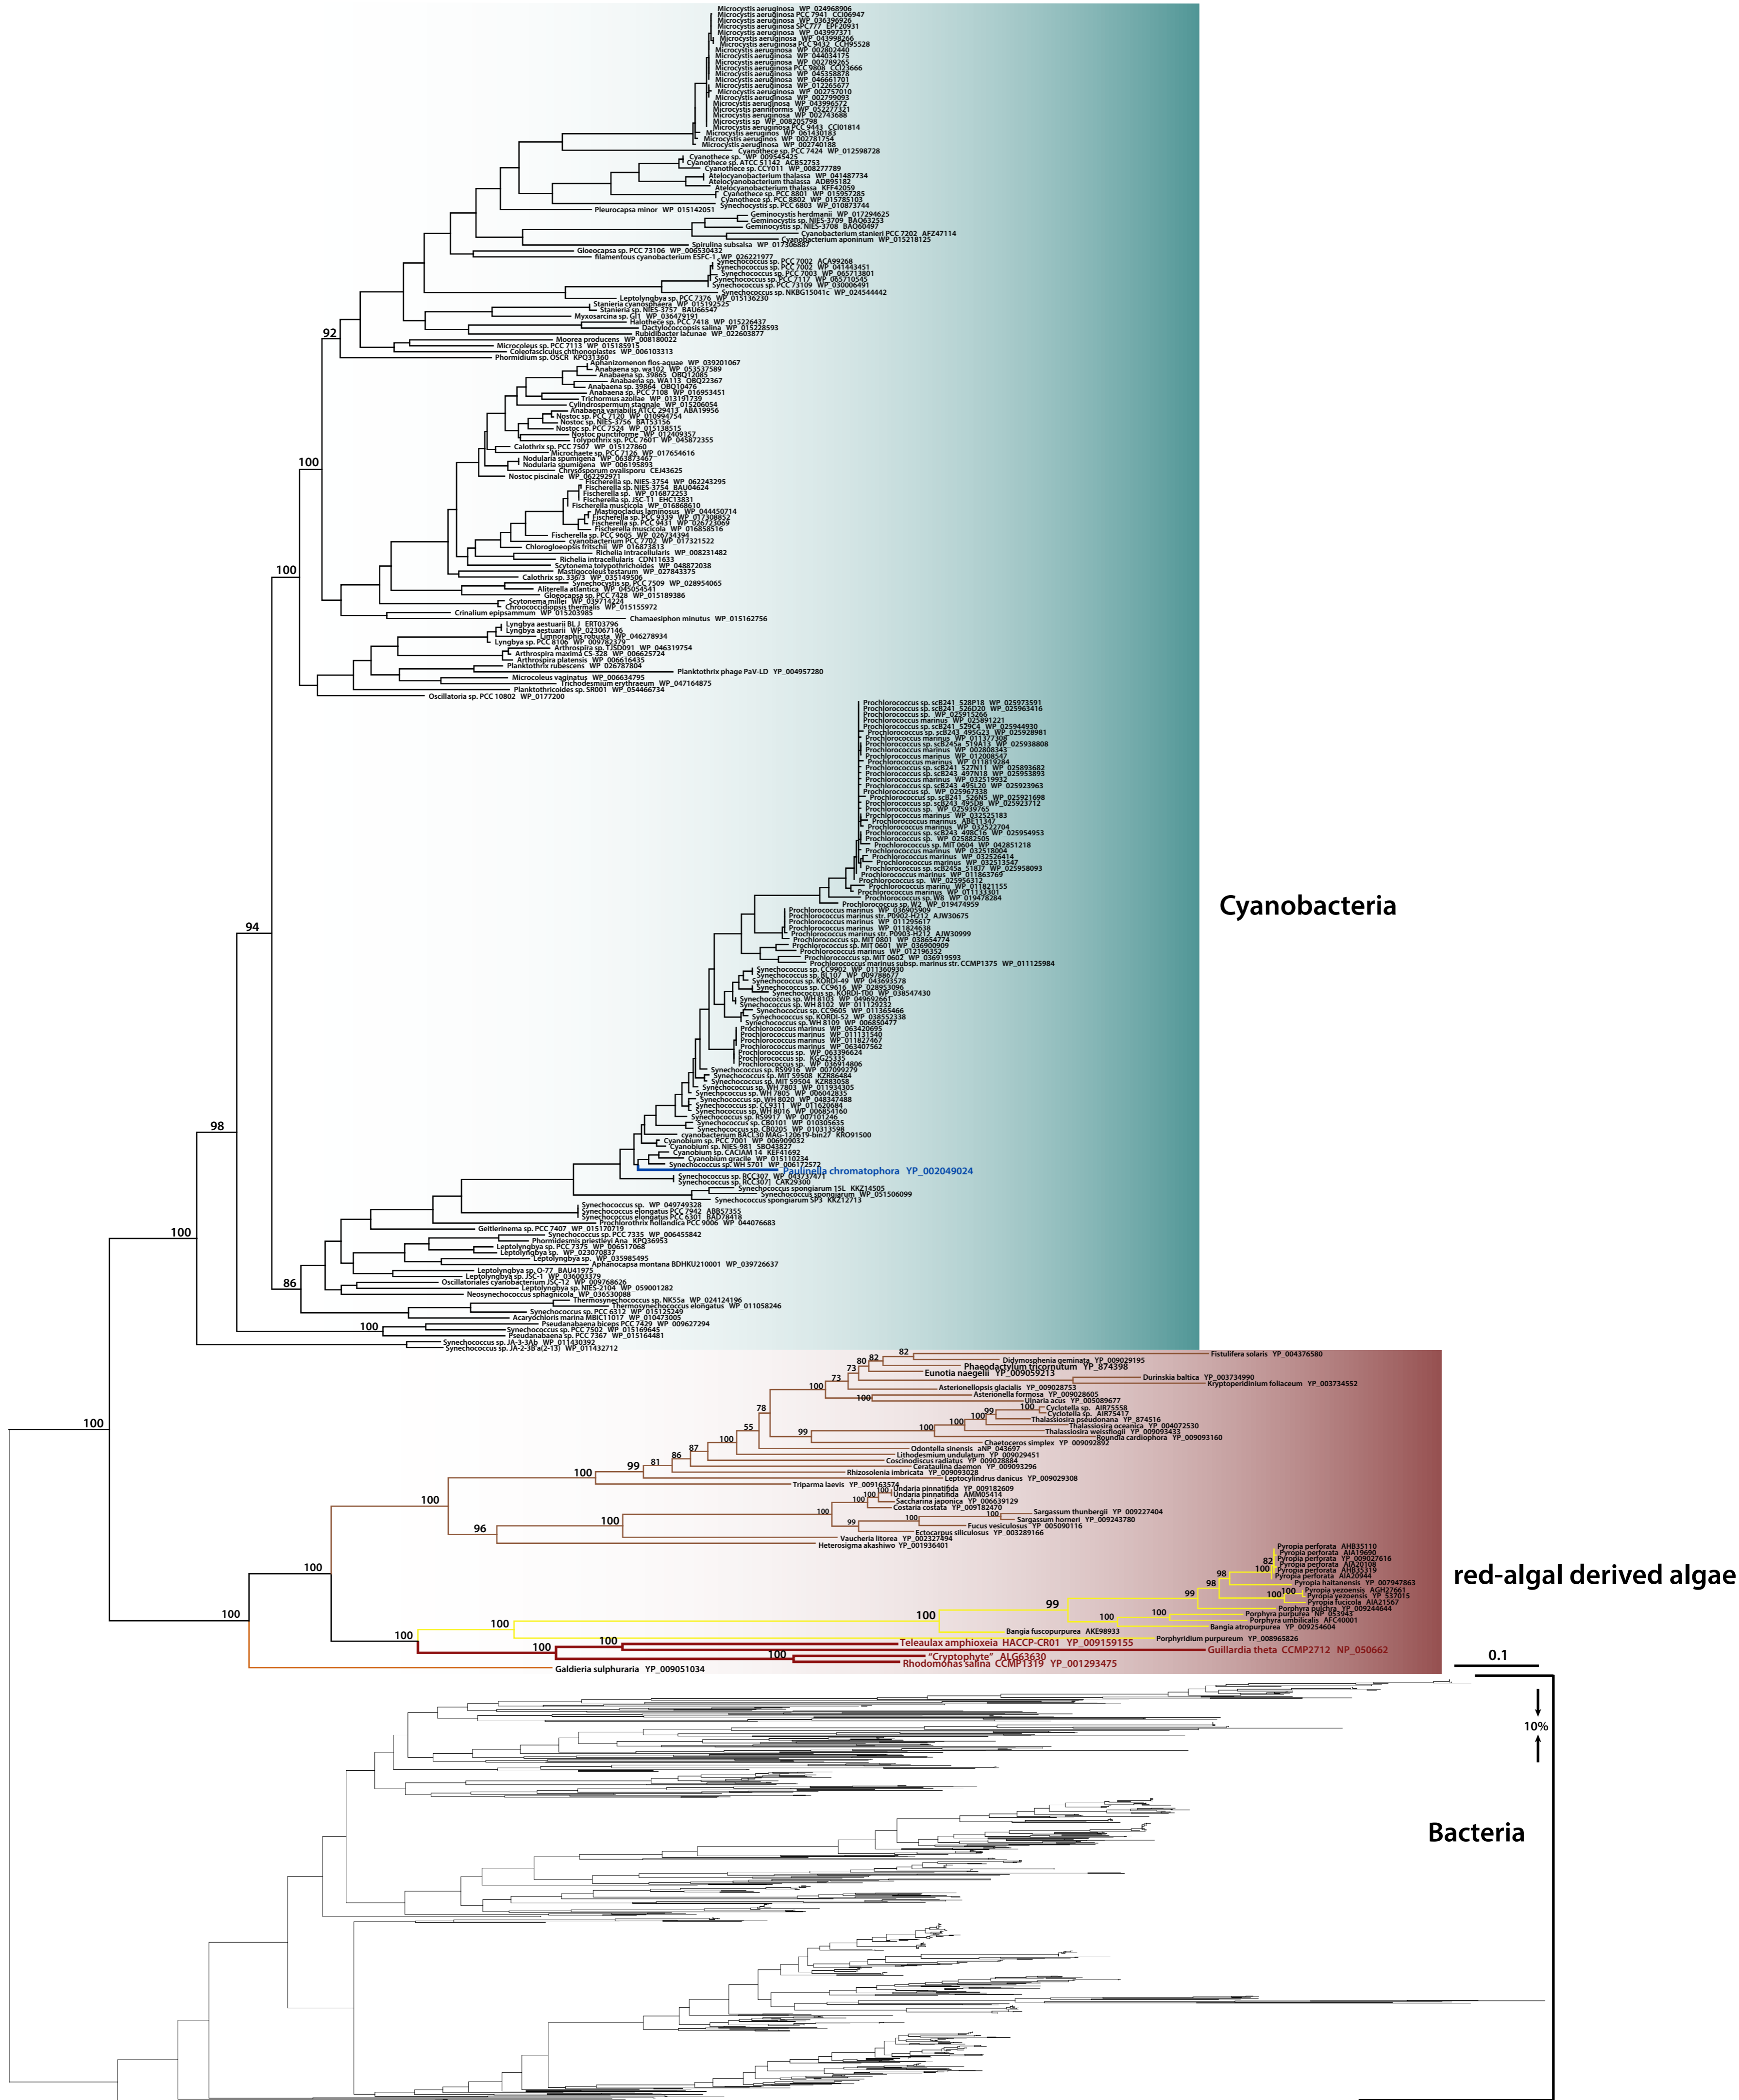

Figure S8. Phylogenetic tree based on *dnaB*.

Supplement: evx123_SuppFig_S8.pdf [file evx123_SuppFig_S8.pdf]

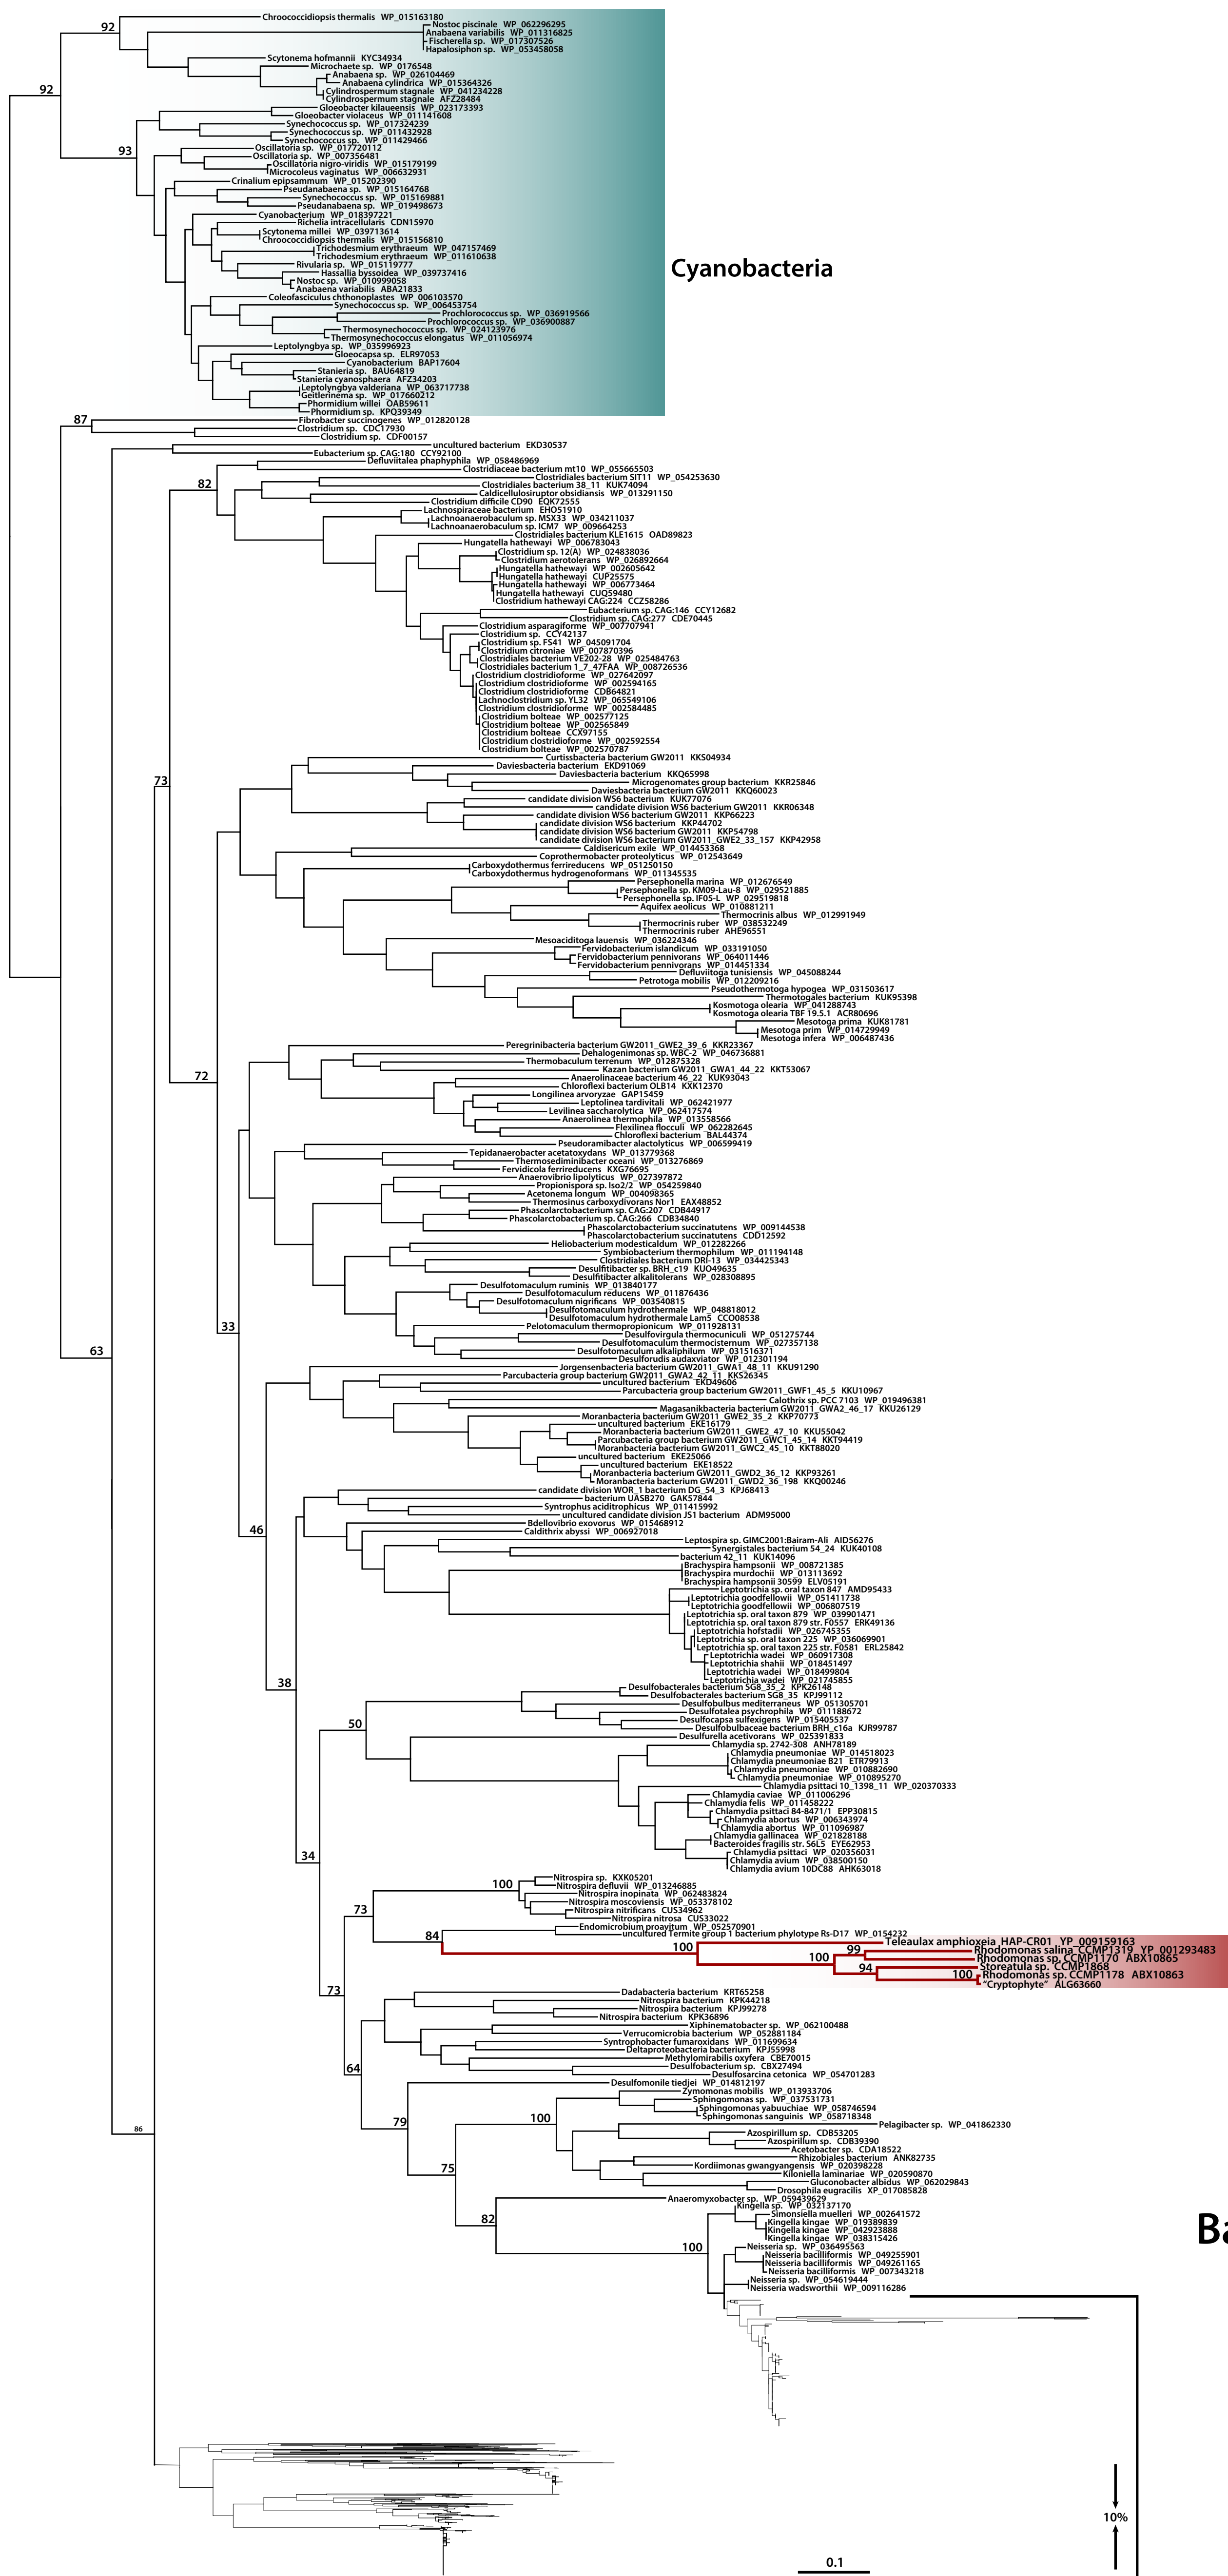

Figure S9. Phylogenetic tree based on *dnaX*.

Supplement: evx123_SuppFig_S9.pdf [file evx123_SuppFig_S9.pdf]
